1 **Comprehensive ecosystem-specific 16S rRNA gene databases with**  
2 **automated taxonomy assignment (AutoTax) provide species-level**  
3 **resolution in microbial ecology**

4 **Authors:** Morten Simonsen Dueholm, Kasper Skytte Andersen, Francesca Petriglieri, Simon Jon  
5 McIlroy\*\*, Marta Nierychlo, Jette Fisher Petersen, Jannie Munk Kristensen, Erika Yashiro, Søren  
6 Michael Karst, Mads Albertsen, Per Halkjær Nielsen\*

7

8 **Affiliation:**

9 Center for Microbial Communities, Department of Chemistry and Bioscience, Aalborg University,  
10 Aalborg, Denmark.

11

12 \*Correspondence to: Per Halkjær Nielsen, Center for Microbial Communities, Department of  
13 Chemistry and Bioscience, Aalborg University, Fredrik Bajers Vej 7H, 9220 Aalborg, Denmark;  
14 Phone: (+45) 9940 8503; Fax: Not available; E-mail: [phn@bio.aau.dk](mailto:phn@bio.aau.dk)

15

16 \*\***Present address:** Australian Centre for Ecogenomics, School of Chemistry and Molecular  
17 Biosciences, University of Queensland, 4072 Brisbane, Australia.

18

19 **Running title:**

20 Species-level resolution in microbial ecology

## 21 **Abstract**

22 High-throughput 16S rRNA gene amplicon sequencing is an indispensable method for studying the  
23 diversity and dynamics of microbial communities. However, this method is presently hampered by  
24 the lack of high-identity reference sequences for many environmental microbes in the public 16S  
25 rRNA gene reference databases, and by the lack of a systematic and comprehensive taxonomic  
26 classification for most environmental bacteria. Here we combine high-quality and high-throughput  
27 full-length 16S rRNA gene sequencing with a novel sequence identity-based approach for  
28 automated taxonomy assignment (AutoTax) to create robust, near-complete 16S rRNA gene  
29 databases for complex environmental ecosystems. To demonstrate the benefit of the approach, we  
30 created an ecosystem-specific database for wastewater treatment systems and anaerobic digesters.  
31 The novel approach allows consistent species-level classification of 16S rRNA amplicons sequence  
32 variants (ASVs) and the design of highly specific oligonucleotide probes for fluorescence *in situ*  
33 hybridization, which can reveal *in situ* properties of microbes at unprecedented taxonomic  
34 resolution.

## 35 **Introduction:**

36 Microbial communities determine the functions of microbial ecosystems in nature and engineered  
37 systems. A deep understanding of the communities requires reliable identification of the microbes  
38 present, as well as linking their identity with functions. Identification at the lowest taxonomic rank  
39 is preferred, as microbial traits vary in their degree of phylogenetic conservation, and many  
40 ecologically important traits are conserved only at the genus to species rank (Martiny *et al.*, 2015).

41 Identification of microbes is commonly achieved by high-throughput 16S rRNA gene  
42 amplicon sequencing, where a segment of the 16S rRNA gene spanning one to three hypervariable  
43 regions is amplified by PCR and sequenced. The amplicons are then clustered, based on sequence  
44 identity into operational taxonomic units (OTUs) or used to infer exact amplicon sequence variants  
45 (ASVs), also known as sub-OTUs (sOTUs) or zero-radius OTUs (zOTUs), with denoising  
46 algorithms such as Deblur (Single- and Sequence, 2017), DADA2 (Callahan *et al.*, 2016), or  
47 Unoise3 (Edgar, 2016b). The sequences are finally classified, based on a 16S rRNA gene reference  
48 database to assign the most plausible taxonomy for each sequence (Caporaso *et al.*, 2010). ASVs  
49 are often preferred over OTUs, because they provide the highest phylogenetic resolution, supporting  
50 sub-genus to sub-species level classification, depending on the 16S rRNA gene region amplified  
51 and the taxon analyzed (Callahan *et al.*, 2017).

52 ASVs can be applied as consistent labels for microbial identification independently of a 16S  
53 rRNA gene reference database (Callahan *et al.*, 2017). This approach is used in several large-scale  
54 projects, including the Earth Microbiome Project (EMP) (Thompson *et al.*, 2017) and the American  
55 Gut project (McDonald *et al.*, 2018), to provide detailed insight into the factors that shape the  
56 overall microbial community diversity and dynamics. However, ASVs are not ideal as references  
57 for linking microbial identity with functions. Firstly, ASVs do not contain enough evolutionary  
58 information to confidently resolve their phylogeny (Yarza *et al.*, 2014; Edgar, 2018), which makes

59 it impossible to report and infer how microbial traits are conserved at different phylogenetic scales.  
60 Secondly, comparison of ASVs is only possible when they are produced and processed in the same  
61 way. This means that, without taxonomic assignment, it is not possible to compare results across  
62 studies that have used primer sets targeting different regions of the 16S rRNA gene. It also hampers  
63 our ability to exploit the power of new and improved sequencing technologies that can produce  
64 longer reads of high quality. Finally, if information about functional properties is available from  
65 pure culture studies or *in situ* studies based on metagenome assembled genomes (MAGs), this  
66 information may be linked to full-length 16S rRNA sequences, but less reliably to ASVs (Yarza *et*  
67 *al.*, 2014; Edgar, 2018). Taxonomic assignment is therefore crucial for cross-study comparisons and  
68 the dissemination of microbial knowledge.

69 Taxonomic assignment to ASVs relies on the classifier (e.g., *sintax* (Edgar, 2016a) or RDP  
70 classifier (Wang *et al.*, 2007)) that applies different algorithms to compare each individual ASV to a  
71 16S rRNA gene reference database and proposes the best estimate for the taxonomy. Confident  
72 classification at the lowest taxonomic ranks requires high-identity reference sequences (~100%  
73 identity) and a comprehensive taxonomy for all references (Edgar, 2018). None of these criteria are  
74 met with the commonly applied universal reference databases (Greengenes (Desantis *et al.*, 2006),  
75 SILVA (Quast *et al.*, 2013), and RDP (Cole *et al.*, 2014)), which lack sequences for many  
76 environmental taxa and a comprehensive taxonomy for most uncultivated taxa.

77 A solution to the aforementioned problems is to create ecosystem-specific reference  
78 databases. Some well-studied medium-complexity ecosystems, such as the human gut (Ritari *et al.*,  
79 2015) or oral microbiomes (Chen *et al.*, 2010; Griffen *et al.*, 2011), now have fairly comprehensive  
80 reference databases with genus- to species-level resolution, which were obtained from thousands of  
81 isolates and MAGs (Ritari *et al.*, 2015; Segota and Long, 2019; Chen *et al.*, 2010). However, this is  
82 not yet the case for most environmental ecosystems.

83 New methods for high-throughput full-length 16S rRNA gene sequencing, e.g., synthetic  
84 long-read sequencing on the Illumina platform (Karst *et al.*, 2018; Burke and Darling, 2016), but  
85 also emerging methods such as PacBio (Callahan *et al.*, 2019) and Nanopore (Karst *et al.*, 2019)  
86 consensus sequencing, now allow generation of millions of high-quality reference sequences from  
87 any environmental ecosystem. This can provide high-identity references for many of the uncultured  
88 taxa which are currently missing in the large universal reference databases. However, it does not  
89 solve the problem of missing or poor taxonomic assignment for many taxa.

90 Current strategies for generating and maintaining ecosystem-specific taxonomies involve  
91 ecosystem-specific curated versions of universal reference databases, where the taxonomy is  
92 manually curated for some process-critical microbes, and placeholder names are provided for the  
93 most abundant uncultured genera. Examples are the MiDAS database for microbes in biological  
94 wastewater treatment systems (McIlroy *et al.*, 2017) and the Dictyopteran gut microbiota reference  
95 Database (DictDb) (Mikaelyan *et al.*, 2015). Another approach is to develop smaller ecosystem-  
96 specific databases that only include sequences from the specific ecosystem, with the taxonomy  
97 rigorously curated by scientists within the field such as the freshwater-specific FreshTrain database  
98 (Newton *et al.*, 2011; Rohwer *et al.*, 2018), the honey bee gut microbiota database (Newton and  
99 Roeselers, 2012), and the rumen and intestinal methanogen database (Seedorf *et al.*, 2014). Such  
100 ecosystem-specific databases greatly improve classification of amplicons that have a suitable  
101 reference in the database, but this may not be the case for a large fraction of the community.  
102 Furthermore, manual ecosystem-specific curation of the reference databases is subjective and hardly  
103 sustainable if we want to expand the databases so that they cover the true diversity of the  
104 ecosystems at high taxonomic resolution, which would probably require 100-1000 times more  
105 sequences (Glöckner *et al.*, 2017).

106 Ideally, we want an automated taxonomy assignment that can provide robust, objective  
107 taxonomic classifications for all 16S rRNA gene reference sequences, based on the most recent  
108 microbial taxonomy with introduction of placeholder names for taxa which have not yet received  
109 official names. To achieve this, we introduce AutoTax - a simple and efficient strategy to create a  
110 comprehensive ecosystem-specific taxonomy covering all taxonomic ranks. AutoTax uses the  
111 SILVA taxonomy as a backbone and provides robust placeholder names for unclassified taxa, based  
112 on *de novo* clustering of sequences according to statistically supported identity thresholds for each  
113 taxonomic rank (Yarza *et al.*, 2014). Due to the strict computational nature of the taxonomy  
114 assignment, we obtain an objective taxonomy, which can easily be updated, based on the most  
115 recent version of the SILVA reference database.

116 We demonstrate the potential of the method by sequencing almost a million full-length small  
117 subunit rRNA gene (fSSU) sequences from Danish bioenergy and biological wastewater treatment  
118 systems and use these after error correction to create a new comprehensive ecosystem-specific  
119 reference database with 9,521 full-length exact sequence variants (ESVs), which were classified  
120 using AutoTax. The value of the new approach was demonstrated by comparing the performance of  
121 the ESV database with the large universal reference database commonly applied. The  
122 comprehensive set of full-length ESVs also allowed the design of species or sequence variant-  
123 specific oligonucleotide probes for fluorescence *in situ* hybridization (FISH). This was exemplified  
124 by new probes for one of the most abundant genera in Danish wastewater treatment systems, the  
125 *Tetrasphaera*, where it enabled the visual distinction of several species revealing different  
126 phenotypes.

## 127 **Materials and methods:**

### 128 **General molecular methods**

129 Concentration and quality of nucleic acids were determined using a Qubit 3.0 fluorometer (Thermo  
130 Fisher Scientific) and an Agilent 2200 TapeStation (Agilent Technologies), respectively. Agencourt  
131 RNAClean XP and AMPure XP beads were used as described by the manufacturer, except for the  
132 washing steps, where 80% ethanol was used. RiboLock RNase inhibitor (Thermo Fisher Scientific)  
133 was added to the purified total RNA to minimise RNA degradation. All commercial kits were used  
134 according to the protocols provided by the manufacturer, unless otherwise stated. Oligonucleotides  
135 used in this study can be found in **Table S1**.

136

### 137 **Samples and nucleic purification**

138 Activated sludge and anaerobic digester biomass were obtained as frozen aliquots (-80°C) from the  
139 MiDAS collection (McIlroy *et al.*, 2017). Sample metadata is provided in **Table S2**. Total nucleic  
140 acids were purified from 500 µL of sample thawed on ice using the PowerMicrobiome RNA  
141 isolation kit (MO BIO Laboratories) with the optional phenol-based lysis or with the RiboPure  
142 RNA purification kit for bacteria (Thermo Fisher Scientific). Purification was carried out according  
143 to the manufacturers' recommendations, except that cell lysis was performed in a FastPrep-24  
144 instrument for 4x 40 s at 6.0 m/s to increase the yield of nucleic acids from bacteria with tough cell  
145 walls (Albertsen *et al.*, 2015). The samples were incubated on ice for 2 min between each bead  
146 beating to minimise heating due to friction. DNA-free total RNA was obtained by treating a  
147 subsample of the purified nucleic acid with the DNase Max kit (MO BIO Laboratories), followed  
148 by clean up using 1.0x RNAClean XP beads with elution into 25 µL nuclease-free water.

149 **Primer-free full-length 16S rRNA library preparation and sequencing**

150 Purified RNA obtained from biomass samples was pooled for each sample source type (activated  
151 sludge or anaerobic digester) to give equimolar amounts of the small subunit ribosomal ribonucleic  
152 acid (SSU rRNA) determined based on peak area in the TapeStation analysis software A.02.02  
153 (SR1). Full-length SSU sequencing libraries were then prepared as previously described (Karst *et*  
154 *al.*, 2018). The SSU\_rRNA\_RT2 (activated sludge) and SSU\_rRNA\_RT3 (anaerobic digester  
155 biomass) reverse transcription primer and the SSU\_rRNA\_1 adaptor were used for the molecular  
156 tagging, and approximately 1,000,000 tagged molecules from each pooled sample were used to  
157 create the clonal library. The final library was sequenced on a HiSeq2500 using on-board clustering  
158 and rapid run mode with a HiSeq PE Rapid Cluster Kit v2 (Illumina) and HiSeq Rapid SBS Kit v2,  
159 265 cycles (Illumina), as previously described (Karst *et al.*, 2018).

160

161 **Primer-based full-length 16S rRNA library preparation and sequencing**

162 The purified nucleic acids obtained from the biomass samples were pooled for each sample source  
163 type (activated sludge or anaerobic digester) with equal weight of DNA from each sample. Full-  
164 length SSU sequencing libraries were then prepared, as previously described (Karst *et al.*, 2018).  
165 The f16S\_rDNA\_pcr1\_fw1 (activated sludge) or f16S\_rDNA\_pcr1\_fw2 (anaerobic digester  
166 biomass) and the f16S\_rDNA\_pcr1\_rv were used for the molecular tagging, and approximately  
167 1,000,000 tagged molecules from each pooled sample were used to create the clonal library. The  
168 final library was sequenced on a HiSeq2500 using on-board clustering and rapid run mode with a  
169 HiSeq PE Rapid Cluster Kit v2 (Illumina) and HiSeq Rapid SBS Kit v2, 265 cycles (Illumina) as  
170 previously described (Karst *et al.*, 2018).



## 171 **Preparation of full-length 16S rRNA gene exact sequence variants (ESVs)**

172 Raw sequence reads were binned, based on the unique molecular tags, *de novo* assembled into the  
173 synthetic long-read rRNA gene sequences using the fSSU-pipeline-DNA\_v1.2.sh or fSSU-pipeline-  
174 RNA\_v1.2.sh scripts script (<https://github.com/KasperSkytte/AutoTax>) (Karst *et al.*, 2018). The  
175 assembled 16S rRNA gene sequences were trimmed equivalent to *E. coli* position 8 and 1507  
176 (RNA-based protocol) or 28 and 1491 (DNA-based protocol), as previously described (Karst *et al.*,  
177 2018). This ensures that the sequences have equal length and that primer binding sites are removed  
178 from the DNA-based sequences. The trimmed sequences were oriented according to the  
179 SILVA\_132\_SSURef\_Nr99 database (Quast *et al.*, 2013) using the usearch11 -orient command,  
180 dereplicated using usearch11 -fastx\_uniques -sizeout and denoised with usearch11 -unoise3 -  
181 minsize 2 to produce "error-free" full-length ESVs. For details see the supplementary results.

182

## 183 **Taxonomy assignment to full-length ESVs**

184 A complete taxonomy from kingdom to species was automatically assigned to each full-length ESV  
185 using the AutoTax.sh scripts (<https://github.com/KasperSkytte/AutoTax>). In brief, this script  
186 identifies the closest relative of each ESV in the SILVA database using usearch, obtains the  
187 taxonomy for this sequence, and discards information at taxonomic ranks not supported by the  
188 sequence identity, based on the thresholds for taxonomic ranks proposed by Yarza *et al.* (Yarza *et*  
189 *al.*, 2014). In addition, full-length ESVs were *de novo* clustered using the UCLUST algorithm and  
190 the same thresholds. The *de novo* clusters were labelled based on number of the centroid ESV, and  
191 these labels acted as a placeholder taxonomy, where there were gaps in the taxonomy obtained from  
192 SILVA. For details, see the supplementary results.

## 193 **Amplicon sequencing and analysis**

194 Bacterial community analysis was performed by amplicon sequencing of the V1-3 variable region  
195 as previous described (Kirkegaard *et al.*, 2017) using the 27F (AGAGTTTGATCCTGGCTCAG)  
196 (Lane, 1991) and 534R (ATTACCGCGGCTGCTGG) (Muyzer *et al.*, 1993) primers and the  
197 purified DNA from above. Forward reads were processed using usearch v.11.0.667. Raw fastq files  
198 were filtered for phiX sequences using -filter\_phix, trimmed to 250 bp using -fastx\_truncate -  
199 trunclen 250, and quality filtered using -fastq\_filter with -fastq\_maxee 1.0. The sequences were  
200 dereplicated using -fastx\_uniques with -sizeout -relabel Uniq. Exact amplicon sequence variants  
201 (ASVs) were generated using -unoise3 (Edgar, 2016b). ASV-tables were created by mapping the  
202 raw reads to the ASVs using -otutab with the -zotus and -strand both options. Taxonomy was  
203 assigned to ASVs using -sintax with -strand both and -sintax\_cutoff 0.8 (Edgar, 2018).

204

## 205 **Data analysis and visualization**

206 Usearch v.11.0.667 was used for mapping sequences to references with -usearch\_global -id 0 -  
207 maxrejects 0 -maxaccepts 0 -top\_hit\_only -strand plus, unless otherwise stated. Data was imported  
208 into R (R Core Team, 2016) using RStudio IDE (RStudio Team, 2015), analysed, and aggregated  
209 using Tidyverse v.1.2.1 (<https://www.tidyverse.org/>), and visualised using ggplot2 (Wickham,  
210 2009) v.3.1.0 and Ampvis (Andersen *et al.*, 2018) v.2.4.0.

211 **Data availability**

212 Raw and assembled sequencing data is available at the European Nucleotide Archive  
213 (<https://www.ebi.ac.uk/ena>) under the project number PRJEB26558. The AutoTax script and  
214 processed reference databases in syntax and qiime format can be found at  
215 <https://github.com/KasperSkytte/AutoTax>.

216

217 **Fluorescence *in situ* hybridization (FISH)**

218 Fresh biomass samples from full-scale activated sludge WWTP were fixed with 96% ethanol and  
219 stored in the freezer (-20°C) until needed. FISH was performed as described by Daims et al. (2005).  
220 Details about the optimal formamide concentration used for each probe are given in **Table S4**. The  
221 EUBmix probe set (Amann *et al.*, 1990; Daims *et al.*, 1999) was used to cover all bacteria, and the  
222 nonsense NON-EUB probe (Wallner *et al.*, 1993) was applied as negative control for sequence-  
223 independent probe binding. Microscopic analysis was performed with either an Axioskop  
224 epifluorescence microscope (Carl Zeiss, Germany), equipped with a Leica DFC7000 T CCD  
225 camera, or a white light laser confocal microscope (Leica TCS SP8 X) (Leica Microsystems,  
226 Wetzlar, Germany).

227

228 **Phylogenetic analysis and FISH probe design**

229 Phylogenetic analysis of 16S rRNA gene sequences and the design of FISH probes for individual  
230 species in the genus *Tetrasphaera* were performed using the ARB software v.6.0.6 (Ludwig *et al.*,  
231 2004). A phylogenetic tree was calculated, based on the aligned 72 new full-length ESVs from the  
232 genus *Tetrasphaera*, using the PhyML maximum likelihood method and a 1000-replicate bootstrap  
233 analysis. Unlabelled helper probes and competitor probes were designed for regions predicted to  
234 have low *in situ* accessibility and for single base mismatched non-target sequences, respectively.

235 Potential probes were validated *in silico* with the MathFISH software for hybridization efficiencies  
236 of target and potentially weak non-target matches (Yilmaz *et al.*, 2011). All probes were purchased  
237 from Sigma-Aldrich (Denmark) or Biomers (Germany), labelled with 6-carboxyfluorescein (6-  
238 Fam), indocarbocyanine (Cy3) or indodicarbocyanine (Cy5) fluorochromes. Optimal hybridization  
239 conditions for novel FISH probes were determined, based on formamide dissociation curves,  
240 generated after hybridization at different formamide concentrations over a range of 0–70% (v/v)  
241 with 5% increments. Relative fluorescence intensities of 50 cells were measured with the ImageJ  
242 software (National Institutes of Health, Maryland, USA) and calculated average values were  
243 compared for selection of the optimal formamide concentration. Where available, pure cultures  
244 were obtained from DSMZ and applied in the optimization process. *Tetrasphaera japonica*  
245 (DSM13192) was used to optimize the probe Tetra183, while *Sanguibacter suarezii* (DSM10543),  
246 *Lactobacillus reuteri* (DSM20016), and *Janibacter melonis* (DSM16063) were used to assess the  
247 need for the specific unlabelled competitor probes Tetra67\_C1, Actino221\_C3, and Tetra732\_C1,  
248 respectively. If appropriate pure cultures were not available, probes were optimized using activated  
249 sludge biomass with a high abundance of the target organism predicted by amplicon sequencing.

250 **Raman microspectroscopy**

251 Raman microspectroscopy was applied in combination with FISH, as previously described  
252 (Fernando *et al.*, 2019). The approach was used to identify phenotypic differences between probe-  
253 defined *Tetrasphaera* phylotypes. Briefly, FISH was conducted on optically polished CaF<sub>2</sub> Raman  
254 windows (Crystran, UK), which give a single-sharp Raman marker at 321 cm<sup>-1</sup> that serves as an  
255 internal reference point in every spectrum. *Tetrasphaera* species-specific (Cy3) probes (**Table S4**)  
256 were used to locate the target cells for Raman analysis. After bleaching the Cy3 fluorophore with  
257 the Raman laser, spectra from single cells were obtained using a Horiba LabRam HR 800 Evolution  
258 (Jobin Yvon – France) equipped with a Torus MPC 3000 (UK) 532 nm 341 mW solid-state  
259 semiconductor laser. The Raman spectrometer was calibrated prior to obtaining all measurements to  
260 the first-order Raman signal of Silicon, occurring at 520.7 cm<sup>-1</sup>. The incident laser power density on  
261 the sample was attenuated down to 2.1 mW/μm<sup>2</sup> using a set of neutral density (ND) filters. The  
262 Raman system is equipped with an in-built Olympus (model BX-41) fluorescence microscope. A  
263 50X, 0.75 numerical aperture dry objective (Olympus M Plan Achromat- Japan), with a working  
264 distance of 0.38 mm, was used throughout the work. A diffraction grating of 600 mm/groove was  
265 used, and the Raman spectra collected spanned the wavenumber region of 200 cm<sup>-1</sup> to 1800 cm<sup>-1</sup>.  
266 The slit width of the Raman spectrometer and the confocal pinhole diameter were set to 100 μm and  
267 72 μm, respectively. Raman spectrometer operation and subsequent processing of spectra were  
268 conducted using LabSpec version 6.4 software (Horiba Scientific, France). All spectra were  
269 baseline corrected using a 6<sup>th</sup> order polynomial fit.

## 270 **Results and discussion:**

### 271 **A comprehensive ecosystem-specific 16S rRNA gene reference database**

272 In order to make a comprehensive ecosystem-specific reference database for Danish wastewater  
273 treatment plants (WWTPs) and their anaerobic digesters, we sampled biomass from 22 typical  
274 WWTPs and 16 anaerobic digesters (ADs) treating waste activated sludge located at Danish  
275 wastewater treatment facilities (**Table S2**). These facilities represent an important engineered  
276 ecosystem containing complex microbial communities of both bacteria and archaea, with the vast  
277 majority of microbes being uncultured and poorly characterized (Wu *et al.*, 2019).

278 DNA and RNA were extracted and pooled separately for each environment and used to  
279 create ecosystem-specific primer-based (DNA-based) and “primer-free” (RNA-based) fSSU  
280 libraries (**Figure 1a**). This resulted in a total of 926,507 fSSU sequences after quality filtering. The  
281 raw sequences were dereplicated and denoised with Unoise3 to generate a comprehensive reference  
282 database of 9,521 ESVs. As each fSSU is independently amplified due to the unique molecular  
283 identifiers (UMIs) added before the PCR amplification steps, the risk of having multiple ESVs with  
284 identical errors is extremely low if we assume random distribution of errors (see supplementary  
285 results). The ESVs are therefore considered to be essentially error-free.

286 To determine the influence of library preparation method, we compared ESVs created based  
287 on fSSU obtained from the four individual libraries. The DNA-based approach yielded approx. 12  
288 times more unique ESVs than the RNA-based approach for the same sequencing cost (**Table S3**).  
289 The reduced number of unique ESVs from the RNA-based libraries was expected, as only 13.3% of  
290 the assembled sequences represented full-length 16S rRNA gene sequences (**Table S3**). As the  
291 Archaea are not targeted by the primers used, we compared the bacterial ESVs from the four  
292 libraries to assess the influence of primer bias (**Figure 1b**). This revealed that 28% and 31% of the  
293 unique ESVs identified in the shallow RNA-based libraries were not present in corresponding

294 DNA-based libraries for activated sludge and anaerobic digesters, respectively. This reveals a bias  
295 associated with the DNA-based method, which is in accordance with previous *in silico* evaluation  
296 of primer bias for the 27F and 1492R primer pair (Karst *et al.*, 2018). The same study predicted that  
297 a better coverage could be achieved by using the 27F and 1391R primer pair (Klindworth *et al.*,  
298 2013) on the expense of sequence length (Karst *et al.*, 2018).

299 To estimate the number of full-length ESVs belonging to novel taxa, ESVs were mapped to  
300 the SILVA\_132\_SSURef\_Nr99 database (Quast *et al.*, 2013) using usearch, and the identity of the  
301 closest relative was compared to the thresholds for taxonomic ranks proposed by Yarza *et al.* 2014)  
302 (**Table 1**). The majority of the ESVs (~94%) had references in the SILVA database with genus-  
303 level support (identity >94.5%), but 26% lacked references above the species-level (identity >  
304 98.7%) (**Table 1**), which are crucial to confident taxonomic classification (Edgar, 2018).

305

### 306 ***Evaluation of the full-length ESV database using amplicon data***

307 In order to evaluate if the full-length ESV database contained high-identity references for all  
308 prokaryotes in the ecosystem, we mapped V1-3 amplicon sequencing data obtained from two  
309 sources: the same samples used to create the ESV database and samples from unrelated Danish  
310 WWTP and ADs. To ensure highest resolution, amplicon data was processed into ASVs. The  
311 ecosystem-specific ESV database (9,521 seq.) included more high-identity references (>98.7%  
312 identity) for all analyzed samples, compared to the 58-353-fold larger universal databases, such as  
313 MiDAS 2.1 (548,447 seq.)(McIlroy *et al.*, 2017), SILVA v.132 SSURef Nr99 (695,171 seq.),  
314 SILVA v.132 SSURef (2,090,668 seq.), GreenGenes 16S v.13.5 (1,262,986 seq.), and the full RDP  
315 v.11.5 (3,356,808 seq.) (**Figure 1c and Figure S1-S2**). A decrease in percentage of ASVs with  
316 high-identity references was observed when low abundant ASVs (the rare biosphere) were included  
317 in the analysis. However, the full-length ESV database still performed as well as the larger

318 universal databases. ASVs were also mapped to the 16S rRNA database derived from the Genome  
319 Taxonomy Database (GTDB) release 89 (17,460 seq) (Parks *et al.*, 2018). However, this database  
320 lacked high-identity references for almost all ASVs, which probably relates to the fact that 16S  
321 rRNA genes often fail to assemble in MAGs produced by short read sequencing data.

322         Since only Danish WWTPs and ADs were used to establish the comprehensive high-identity  
323 full-length ESV reference database, published amplicon data from non-Danish WWTPs (Isazadeh *et*  
324 *al.*, 2016; Gonzalez-Martinez *et al.*, 2016) was also evaluated (**Figure 1d-e, and S3-S4**). Compared  
325 to all universal reference databases, the Danish reference ESVs performed better or as well for most  
326 of the investigated non-Danish WWTPs, which indicates that the database covers many of the  
327 microbes that are common in WWTP across the world. We anticipate that high-throughput 16S  
328 rRNA gene sequencing of non-Danish WWTP and ADs will provide references for the region-  
329 specific taxa in the future.

330

### 331 ***A new comprehensive taxonomic framework***

332 A major limitation in the classification of amplicon data from environmental samples is the lack of  
333 lower rank taxonomic information (family, genus, and species names) for many uncultivated  
334 bacteria in the universal reference databases. To address this, we developed a robust taxonomic  
335 framework (AutoTax), which provides consistent taxonomic classification of all sequences to all  
336 seven taxonomic ranks by using a reproducible computational approach, based on identity  
337 thresholds (**Figure 2**).

338         The full-length ESVs were first mapped to the SILVA\_SSURef\_Nr99 database, which  
339 provides the taxonomy of the closest relative in the database as well as the percent identity between  
340 the ESV and this reference. The taxonomy was assigned to the ESV down to the taxonomic rank  
341 that is supported by the sequence identity thresholds proposed by Yarza *et al.* (2014) (**Table 1**). As



342 the SILVA taxonomy does not include species names, ESVs were also mapped to 16S rRNA gene  
343 sequences from type strains extracted from the SILVA database. Species names were added to the  
344 ESVs if the identity was above 98.7%, and the genus name obtained from the type strains was  
345 identical to that obtained from the complete SILVA database. Although there are examples of  
346 separate species with 16S rRNA genes that share more than 98.7% sequence similarity and  
347 genomes with intragenomic copies that are less than 98.7% conserved, these are exceptions rather  
348 than the norm (Kim *et al.*, 2014; Větrovský and Baldrian, 2013). The AutoTax approach will  
349 therefore provide confident species-level classifications for the vast majority of the ESVs.

350 To fill gaps in the taxonomy, all ESVs were trimmed and clustered using the UCLUST  
351 cluster\_smallmem algorithm and the taxonomic thresholds proposed by Yarza *et al.* (2014). With  
352 this algorithm sequences are processed in the order they appear in the input file, i.e., if the next  
353 sequence matches an existing centroid, it is assigned to that cluster, otherwise it becomes the  
354 centroid of a new cluster. This ensures that the same clusters and centroids are formed every time,  
355 even if additional ESVs are added to the reference database in the future. The reproducibility of the  
356 approach was confirmed by processing only the first half of the ESVs, which yielded identical  
357 clusters. Merging of the SILVA- and the *de novo*-based taxonomies may result in conflicts (e.g.,  
358 multiple ESVs from the same species associate with different genera). When this is the case, the  
359 taxonomy for the ESV, which first appears in the reference database, is adapted for all ESVs within  
360 that species. The pipeline produces formatted reference databases, which can be directly used for  
361 classification using syntax or classifiers in the qiime2 framework.

362 AutoTax provided placeholder names for many previously undescribed taxa (**Table 2**,  
363 **Figure S5**). Essentially all species, more than 72% of all genera, 50% of all families, and 30% of all  
364 orders, obtained their names from the *de novo* taxonomy and would otherwise have remained  
365 unclassified. The novel taxa were affiliated with several phyla, especially the Proteobacteria,

366 Planctomycetes, Patescibacteria, Firmicutes, Chloroflexi, Bacteroidetes, Actinobacteria, and  
367 Acidobacteria (**Figure S5**). A prominent example is the Chloroflexi, where only 9/14 orders, 8/34  
368 families, and 10/152 genera observed here were classified using the SILVA database, clearly  
369 showing the need for an improved taxonomy. This will have important implications for the study of  
370 these communities, given the high diversity and abundance of members of this phylum and their  
371 association with the sometimes serious operational problems of bulking and foaming (McIlroy *et*  
372 *al.*, 2016; Petriglieri *et al.*, 2018).

373 To benchmark the full-length ESV database, we classified amplicon data obtained from activated  
374 sludge and anaerobic digester samples using this database and compared the results to  
375 classifications obtained from the universal reference databases (**Figure 3a**). The ESV database was  
376 able to classify many more of the ASVs to the genus level (~90%), compared to  
377 SILVA\_132\_SSURef\_Nr99 (~45%), GreenGenes\_16s\_13.5 (~25-30%), GTDB\_r89 (~20-25%),  
378 and the RDP\_16S\_v16 training set (~25%) but also compared to gold standard within wastewater  
379 treatment systems MiDAS 2.1 (~65%), which is a manually ecosystem-specific curated version of  
380 the SILVA\_123\_SSURef\_Nr99 database. Importantly, many of the top 50 most abundant ASVs  
381 only received classification with the AutoTax processed ESV database (**Figure 4 and S6**).

382 The use of the ecosystem-specific full-length ESV database thus significantly improved the  
383 classification at all taxonomic levels and, importantly, provided species-level classifications for the  
384 majority of the ASVs (~85%). To investigate the effect of the taxonomy assignment by AutoTax  
385 alone, we processed the SILVA\_132\_SSURef\_Nr99 database using AutoTax. This increased the  
386 percentage of ASVs classified at the genus-level from ~45% to ~75%, and at the species-level from  
387 0% to ~45%, demonstrating that the large universal databases would also benefit from the use of  
388 AutoTax. However, as better classifications are obtained using smaller ecosystem-specific

389 databases, we anticipate that such databases should be used whenever a defined ecosystem is  
390 studied.

391 Confident classification of amplicon sequences based on reference databases can be  
392 challenging due to the limited taxonomic information in short sequences (Yarza *et al.*, 2014; Edgar,  
393 2018). To investigate the confidence of the amplicon classification, we extracted ASV sets *in silico*  
394 from the bacterial full-length ESVs, corresponding to commonly amplified 16S rRNA regions.  
395 These ASVs were classified using *sintax* and the full-length ESV database. We then calculated the  
396 fraction of amplicons, which was correctly classified to the same genus and species as their source  
397 ESV (**Figure 3b**). More than 95% of the ASVs were assigned to the correct genus and 72-90% to  
398 the correct species, depending on primer set used. The primers targeting the V1-3 variable region  
399 performed especially well for species-level identification (90% correct classifications), while the  
400 commonly used primers targeting the V4 variable region were among the worst (72% correct  
401 classifications). Further analysis of the ASV that did not receive a correct classification revealed  
402 that the majority did not get any classification, and very few obtained wrong classifications (<0.2%  
403 at genus-level and <0.8% at species-level).

404 Sequencing costs can be reduced considerably if single reads are used instead of merged  
405 reads. To evaluate the effect of reduced amplicon length, trimmed forward reads (250 and 200 bp)  
406 were also classified (**Figure 3b**). The percentage of correct classifications decreased only  
407 marginally for the V1-3, V4, and V45 primer sets, whereas a more pronounced effect was observed  
408 for the V3-4, V3-5, and V5-8 ASVs. Single reads of 250 or 200 bp are thus sufficient for some  
409 primer sets.

410 Overall, the analysis demonstrated that the use of a comprehensive, high-quality reference  
411 database allows the confident classification of ASV sequences at the genus to species level  
412 depending of the primer sets used.

413           When choosing primers for amplicon sequence analyses, it is important also to take primer-  
414 bias into account (Albertsen *et al.*, 2015). If a poor choice is made, process-relevant species may not  
415 appear, or they may be severely underestimated. For activated sludge, it has previously been shown  
416 that the V1-3 primers have a good overall agreement with metagenomic data and capture many of  
417 the process-relevant organisms, whereas the V4 primers underestimate the abundance of the  
418 process-critical Chloroflexi and Actinobacteria (Albertsen *et al.*, 2015). Access to a comprehensive  
419 ecosystem-specific full-length 16S rRNA gene database provides an opportunity to determine the  
420 theoretical coverage of different primer sets *in silico* for the given ecosystem so that an informed  
421 decision can be made (Walters *et al.*, 2011; Klindworth *et al.*, 2013).

422

#### 423 ***Species-specific FISH probes for Tetrasphaera spp.***

424 A valuable benefit for the generation of ecosystem-specific databases is the design and selection of  
425 probes and primers for specific populations. FISH-based visualization of populations is central to  
426 many studies in microbial ecology, yet with the expanding 16S rRNA gene databases, finding probe  
427 sites allowing confident differentiation of target lineages is becoming increasingly difficult. Probe  
428 specificity and coverage are routinely assessed, based on all the sequences in public databases, yet  
429 both parameters may be very different when considering only the microorganisms present in the  
430 ecosystem of study. The use of ecosystem-specific databases therefore provides a more accurate  
431 assessment of probe specificity and coverage and will likely also allow the confident design and  
432 application of probes for targeting lineages at a higher taxonomic resolution, such as species.  
433 To illustrate the benefit of using the new high-quality reference ESV database, more detailed  
434 analyses of the genus *Tetrasphaera* were performed. It is the most abundant genus in Danish  
435 WWTPs (McIlroy *et al.*, 2017) and is associated with the polyphosphate-accumulating organism  
436 (PAO) phenotype, important for the capture and removal of phosphorus in the WWTPs (Nguyen *et*

437 *al.*, 2011; Marques *et al.*, 2017; Fernando *et al.*, 2019). Despite the importance of the genus, it is  
438 unknown how many species co-exist in these systems and whether they all possess the PAO  
439 metabolism. Phylogenetic analysis of 75 ESVs belonging to the genus *Tetrasphaera* retrieved in  
440 this study revealed an evident separation into 19 species across 22 Danish WWTPs, providing for  
441 the first time a comprehensive overview of the diversity of *Tetrasphaera* in activated sludge  
442 systems (**Figure 5a**). Several of the sequences retrieved were identical to those of the described  
443 pure cultures, while the majority were novel and not present in existing databases. The 10 most  
444 abundant species are shown in **Figure 5b**. In order to reveal possible variations in morphology and  
445 physiology of *Tetrasphaera*, the new ESV database was used to design a comprehensive set of  
446 FISH probes covering the abundant species (**Figure 5a**). Of those, only the two most abundant  
447 species in Danish WWTPs were targeted by the existing probes (Actino-658 and Actino-221)  
448 (Kong *et al.*, 2005) with high specificity and coverage. Other existing FISH probes targeting genus  
449 *Tetrasphaera* (Nguyen *et al.*, 2011) did not show *in silico* high specificity and/or coverage.

450         The new species-specific probes designed to target the remaining abundant species, which  
451 can create up to 2-3% of the biomass in some plants (**Figure 5a**), revealed different morphologies  
452 (rod-shaped cells, tetrads, filaments, **Figure 5c**). Having probes for these different species most  
453 importantly allows *in situ* single cell analyses for each. Using these FISH probes in combination  
454 with Raman microspectroscopy, it was confirmed that all the FISH-defined *Tetrasphaera* species  
455 were likely PAOs, based on the presence of a large peak for poly-P ( $1170\text{ cm}^{-1}$ , **Figure 5d**). No  
456 Raman peaks were found for other intracellular storage compounds such as glycogen, PHA, or  
457 trehalose – consistent with current models for the physiology of the genus in these systems.  
458 Additionally, the new reference database was used to design a probe set (Tetra183 + Tetra617) for  
459 genus-level screenings of all abundant species of *Tetrasphaera* in Danish plants for (**Figure 5a**),  
460 which was otherwise not possible..

461 **Acknowledgements**

462 We would like to thank the 25 wastewater treatment plants involved in the project for providing  
463 samples. This work was supported by the Danish Research Council [6111-00617A to P.H.N.]; and  
464 the Villum foundation [13351 to P.H.N.].

465

466 **Conflict of Interest**

467 The authors declare no conflict of interest.

468 **References:**

- 469 Albertsen M, Karst SM, Ziegler AS, Kirkegaard RH, Nielsen PH. (2015). Back to basics - the  
470 influence of DNA extraction and primer choice on phylogenetic analysis of activated sludge  
471 communities. *PLoS One* **10**: e0132783.
- 472 Amann RI, Binder BJ, Olson RJ, Chisolm SW, Devereux R, Stahl DA. (1990). Combination of 16S  
473 rRNA-targeted oligonucleotide probes with flow cytometry for analyzing mixed microbial  
474 populations. *Appl Env Microbiol* **56**: 1919–1925.
- 475 Andersen KSS, Kirkegaard RH, Karst SM, Albertsen M. (2018). ampvis2: an R package to analyse  
476 and visualise 16S rRNA amplicon data. *bioRxiv* 299537.
- 477 Apprill A, McNally S, Parsons R, Weber L. (2015). Minor revision to V4 region SSU rRNA 806R  
478 gene primer greatly increases detection of SAR11 bacterioplankton. *Aquat Microb Ecol* **75**: 129–  
479 137.
- 480 Burke CM, Darling AE. (2016). A method for high precision sequencing of near full-length 16S  
481 rRNA genes on an Illumina MiSeq. *PeerJ* **4**: e2492.
- 482 Callahan BJ, McMurdie PJ, Holmes SP. (2017). Exact sequence variants should replace operational  
483 taxonomic units in marker-gene data analysis. *ISME J* **11**: 2639–2643.
- 484 Callahan BJ, McMurdie PJ, Rosen MJ, Han AW, Johnson AJA, Holmes SP. (2016). DADA2:  
485 High-resolution sample inference from Illumina amplicon data. *Nat Methods* **13**: 581–583.
- 486 Callahan BJ, Wong J, Heiner C, Oh S, Theriot CM, Gulati AS, *et al.* (2019). High-throughput  
487 amplicon sequencing of the full-length 16S rRNA gene with single-nucleotide resolution. *Nucleic*  
488 *Acids Res* 1–12.

- 489 Caporaso JG, Lauber CL, Walters WA, Berg-Lyons D, Lozupone CA, Turnbaugh PJ, *et al.* (2010).  
490 Global patterns of 16S rRNA diversity at a depth of millions of sequences per sample. *Proc Natl*  
491 *Acad Sci* **108**: 4516 LP – 4522.
- 492 Chen T, Yu W-H, Izard J, Baranova O V, Lakshmanan A, Dewhirst FE. (2010). The Human Oral  
493 Microbiome Database: a web accessible resource for investigating oral microbe taxonomic and  
494 genomic information. *Database (Oxford)* **2010**: baq013.
- 495 Cole JR, Wang Q, Fish JA, Chai B, McGarrell DM, Sun Y, *et al.* (2014). Ribosomal Database  
496 Project: data and tools for high throughput rRNA analysis. *Nucleic Acids Res* **42**: D633-42.
- 497 Daims H, Brühl A, Amann R, Schleifer KH, Wagner M. (1999). The domain-specific probe  
498 EUB338 is insufficient for the detection of all Bacteria: development and evaluation of a more  
499 comprehensive probe set. *Syst Appl Microbiol* **22**: 434–444.
- 500 Daims H, Stoecker K, Wagner M. (2005). Fluorescence *in situ* hybridization for the detection of  
501 prokaryotes. In: Osborn AM, Smith CJ (eds). *Molecular microbial ecology*. New York: Taylor &  
502 Francis Group, pp 213–239.
- 503 Desantis TZ, Hugenholtz P, Larsen N, Rojas M, Brodie EL, Keller K, *et al.* (2006). Greengenes , a  
504 Chimera-Checked 16S rRNA Gene Database and Workbench Compatible with ARB. **72**: 5069–  
505 5072.
- 506 Edgar R. (2016a). SINTAX: a simple non-Bayesian taxonomy classifier for 16S and ITS sequences.  
507 *bioRxiv* 074161.
- 508 Edgar RC. (2018). Accuracy of taxonomy prediction for 16S rRNA and fungal ITS sequences.  
509 *PeerJ* **6**: e4652.



- 510 Edgar RC. (2016b). UNOISE2: improved error-correction for Illumina 16S and ITS amplicon  
511 sequencing. *bioRxiv* 81257.
- 512 Fernando EY, McIlroy SJ, Nierychlo M, Herbst F-A, Schmid MC, Wagner M, *et al.* (2019).  
513 Resolving the individual contribution of key microbial populations to enhanced biological  
514 phosphorus removal with Raman-FISH. *ISME J.* e-pub ahead of print, doi: 10.1101/387795.
- 515 Glöckner FO, Yilmaz P, Quast C, Gerken J, Beccati A, Ciuprina A, *et al.* (2017). 25 years of  
516 serving the community with ribosomal RNA gene reference databases and tools. *J Biotechnol* **261**:  
517 169–176.
- 518 Gonzalez-Martinez A, Rodriguez-Sanchez A, Lotti T, Garcia-Ruiz MJ, Osorio F, Gonzalez-Lopez  
519 J, *et al.* (2016). Comparison of bacterial communities of conventional and A-stage activated sludge  
520 systems. *Sci Rep* **6**. e-pub ahead of print, doi: 10.1038/srep18786.
- 521 Griffen AL, Beall CJ, Firestone ND, Gross EL, DiFranco JM, Hardman JH, *et al.* (2011). CORE: A  
522 phylogenetically-curated 16S rDNA database of the core oral microbiome. *PLoS One* **6**: 1–10.
- 523 Isazadeh S, Jauffur S, Frigon D. (2016). Bacterial community assembly in activated sludge:  
524 mapping beta diversity across environmental variables. *Microbiologyopen* **5**: 1050–1060.
- 525 Karst SM, Dueholm MS, McIlroy SJ, Kirkegaard RH, Nielsen PH, Albertsen M. (2018). Retrieval  
526 of a million high-quality , full-length microbial 16S and 18S rRNA gene sequences without primer  
527 bias. *Nat Biotechnol* **36**: 190–195.
- 528 Karst SM, Ziels RM, Kirkegaard RH, Albertsen M. (2019). Enabling high-accuracy long-read  
529 amplicon sequences using unique molecular identifiers and Nanopore sequencing. *bioRxiv* 645903.
- 530 Kim M, Oh H-SS, Park S-CC, Chun J. (2014). Towards a taxonomic coherence between average

- 531 nucleotide identity and 16S rRNA gene sequence similarity for species demarcation of prokaryotes.  
532 *Int J Syst Evol Microbiol* **64**: 346–351.
- 533 Kirkegaard RH, McIlroy SJ, Kristensen JM, Nierychlo M, Karst SM, Dueholm MS, *et al.* (2017).  
534 The impact of immigration on microbial community composition in full-scale anaerobic digesters.  
535 *Sci Rep* **7**. e-pub ahead of print, doi: 10.1038/s41598-017-09303-0.
- 536 Klindworth A, Pruesse E, Schweer T, Peplies J, Quast C, Horn M, *et al.* (2013). Evaluation of  
537 general 16S ribosomal RNA gene PCR primers for classical and next-generation sequencing-based  
538 diversity studies. *Nucleic Acids Res* **41**: 1–11.
- 539 Kong Y, Nielsen JL, Nielsen PH. (2005). Identity and Ecophysiology of Uncultured Actinobacterial  
540 Polyphosphate-Accumulating Organisms in Full-Scale Enhanced Biological Phosphorus Removal  
541 Plants. *Appl Environ Microbiol* **71**: 4076 LP – 4085.
- 542 Lane DJ. (1991). 16S/23S rRNA sequencing. In: Stackebrandt E, Goodfellow M (eds). *Nucleic Acid*  
543 *Techniques in Bacterial Systematics*. John Wiley and Sons: Chichester, United Kingdom, pp 115–  
544 175.
- 545 Ludwig W, Strunk O, Westram R, Richter L, Meier H, Yadhukumar a., *et al.* (2004). ARB: A  
546 software environment for sequence data. *Nucleic Acids Res* **32**: 1363–1371.
- 547 Marques R, Santos J, Nguyen H, Carvalho G, Noronha JP, Nielsen PH, *et al.* (2017). Metabolism  
548 and ecological niche of Tetrasphaera and Ca. Accumulibacter in enhanced biological phosphorus  
549 removal. *Water Res* **122**: 159–171.
- 550 Martiny JBH, Jones SE, Lennon JT, Martiny AC. (2015). Microbiomes in light of traits: A  
551 phylogenetic perspective. *Science (80- )* **350**: aac9823-18.

- 552 McDonald D, Hyde E, Debelius JW, Morton JT, Gonzalez A, Ackermann G, *et al.* (2018).  
553 American Gut : an Open Platform for Citizen Science. *mSystems* **3**: 1–28.
- 554 McIlroy SJ, Kirkegaard RH, McIlroy B, Nierychlo M, Kristensen JM, Karst SMSMSM, *et al.*  
555 (2017). MiDAS 2.0: An ecosystem-specific taxonomy and online database for the organisms of  
556 wastewater treatment systems expanded for anaerobic digester groups. *Database* **2017**: 1–9.
- 557 McIlroy SJSJ, Karst SMSMSM, Nierychlo M, Dueholm MSMS, Albertsen M, Kirkegaard RHRH,  
558 *et al.* (2016). Genomic and in situ investigations of the novel uncultured Chloroflexi associated with  
559 0092 morphotype filamentous bulking in activated sludge. *ISME J (In press)*: 1–12.
- 560 Mikaelyan A, Köhler T, Lampert N, Rohland J, Boga H, Meuser K, *et al.* (2015). Classifying the  
561 bacterial gut microbiota of termites and cockroaches: A curated phylogenetic reference database  
562 (DictDb). *Syst Appl Microbiol* **38**: 472–482.
- 563 Muyzer G, de Waal EC, Uitterlinden AG. (1993). Profiling of complex microbial populations by  
564 denaturing gradient gel electrophoresis analysis of polymerase chain reaction-amplified genes  
565 coding for 16S rRNA. *AEM* **59**: 695–700.
- 566 Newton IL, Roeselers G. (2012). The effect of training set on the classification of honey bee gut  
567 microbiota using the Naïve Bayesian Classifier. *BMC Microbiol* **12**: 221.
- 568 Newton RJ, Jones SE, Eiler A, McMahan KD, Bertilsson S. (2011). A Guide to the Natural History  
569 of Freshwater Lake Bacteria.
- 570 Nguyen HTT, Le VQ, Hansen AA, Nielsen JL, Nielsen PH. (2011). High diversity and abundance  
571 of putative polyphosphate-accumulating Tetrasphaera-related bacteria in activated sludge systems.  
572 *FEMS Microbiol Ecol* **76**: 256–267.

- 573 Parada AE, Needham DM, Fuhrman JA. (2016). Every base matters: Assessing small subunit rRNA  
574 primers for marine microbiomes with mock communities, time series and global field samples.  
575 *Environ Microbiol* **18**: 1403–1414.
- 576 Parks DH, Chuvochina M, Waite DW, Rinke C, Skarshewski A, Chaumeil P-A, *et al.* (2018). A  
577 standardized bacterial taxonomy based on genome phylogeny substantially revises the tree of life.  
578 *Nat Biotechnol* **36**: 996.
- 579 Peterson J, Bonazzi V, Starke-Reed P, Read J, Zakhari S, Baker CC, *et al.* (2009). The NIH Human  
580 Microbiome Project. *Genome Res* **19**: 2317–2323.
- 581 Petriglieri F, Nierychlo M, Nielsen PH, Jon S, Id M. (2018). In situ visualisation of the abundant  
582 Chloroflexi populations in full-scale anaerobic digesters and the fate of immigrating species. 1–14.
- 583 Quast C, Pruesse E, Yilmaz P, Gerken J, Schweer T, Yarza P, *et al.* (2013). The SILVA ribosomal  
584 RNA gene database project: Improved data processing and web-based tools. *Nucleic Acids Res* **41**:  
585 D590-6.
- 586 R Core Team. (2016). R: A language and environment for statistical computing. [http://www.r-](http://www.r-project.org/)  
587 [project.org/](http://www.r-project.org/).
- 588 Ritari J, Salojärvi J, Lahti L, de Vos WM. (2015). Improved taxonomic assignment of human  
589 intestinal 16S rRNA sequences by a dedicated reference database. *BMC Genomics* **16**: 1056.
- 590 Rohwer RR, Hamilton JJ, Newton RJ, McMahon KD. (2018). TaxAss: Leveraging a Custom  
591 Freshwater Database Achieves Fine-Scale Taxonomic Resolution. *mSphere* **3**: 1–14.
- 592 RStudio Team. (2015). RStudio: Integrated Development Environment for R.  
593 <http://www.rstudio.com/>.

- 594 Seedorf H, Kittelmann S, Henderson G, Janssen PH. (2014). RIM-DB: a taxonomic framework for  
595 community structure analysis of methanogenic archaea from the rumen and other intestinal  
596 environments. *PeerJ* **2**: e494.
- 597 Segota I, Long T. (2019). A high-resolution pipeline for 16S-sequencing identifies bacterial strains  
598 in human microbiome.
- 599 Single- DRR, Sequence NC. (2017). Deblur Rapidly Resolves Single-. **2**: 1–7.
- 600 Thompson LR, Sanders JG, McDonald D, Amir A, Ladau J, Locey KJ, *et al.* (2017). A communal  
601 catalogue reveals Earth’s multiscale microbial diversity. *Nature* **551**: 457–463.
- 602 Větrovský T, Baldrian P. (2013). The Variability of the 16S rRNA Gene in Bacterial Genomes and  
603 Its Consequences for Bacterial Community Analyses. *PLoS One* **8**: 1–10.
- 604 Wallner G, Amann R, Beisker W. (1993). Optimizing fluorescent *in situ* hybridization with rRNA-  
605 targeted oligonucleotide probes for flow cytometric identification of microorganisms. *Cytometry*  
606 **14**: 136–143.
- 607 Walters WA, Caporaso JG, Lauber CL, Berg-Lyons D, Fierer N, Knight R. (2011).  
608 PrimerProspector: De novo design and taxonomic analysis of barcoded polymerase chain reaction  
609 primers. *Bioinformatics* **27**: 1159–1161.
- 610 Wang Q, Garrity GM, Tiedje JM, Cole JR. (2007). Naive Bayesian classifier for rapid assignment  
611 of rRNA sequences into the new bacterial taxonomy. *Appl Environ Microbiol* **73**: 5261–5267.
- 612 Wickham H. (2009). ggplot2 - Elegant Graphics for Data Analysis. Springer Science & Business  
613 Media.

- 614 Wu L, Ning D, Zhang B, Li Y, Zhang P, Shan X, *et al.* (2019). Global diversity and biogeography  
615 of bacterial communities in wastewater treatment plants. *Nat Microbiol.* e-pub ahead of print, doi:  
616 10.1038/s41564-019-0426-5.
- 617 Yarza P, Yilmaz P, Pruesse E, Glöckner FO, Ludwig W, Schleifer K-H, *et al.* (2014). Uniting the  
618 classification of cultured and uncultured bacteria and archaea using 16S rRNA gene sequences. *Nat*  
619 *Rev Microbiol* **12**: 635–645.
- 620 Yilmaz LS, Parnerkar S, Noguera DR. (2011). MathFISH, a web tool that uses thermodynamics-  
621 based mathematical models for *in silico* evaluation of oligonucleotide probes for fluorescence *in*  
622 *situ* hybridization. *Appl Environ Microbiol* **77**: 1118–1122.
- 623

624 **Tables:**

625

626 **Table 1: Numbers and percentage of full-length ESVs estimated to belong to novel taxa.** ESVs

627 were mapped to SILVA\_132\_SSURef\_Nr99 to find the identity with the closest relative in the

628 database. Novelty was determined, based on the identity for each ESV, based on the taxonomic

629 thresholds proposed by Yarza et al. (2014).

| Environment        | Library  | Kingdom  | nSeqs | Species<br><98.7% | Genus<br><94.5% | Family<br><86.5% | Order<br><82.0% | Class<br><78.5% | Phylum<br><75.0% |
|--------------------|----------|----------|-------|-------------------|-----------------|------------------|-----------------|-----------------|------------------|
| Activated sludge   | RNA      | Archaea  | 5     | 0                 | 0               | 0                | 0               | 0               | 0                |
| Activated sludge   | RNA      | Bacteria | 460   | 35 (7.61%)        | 1 (0.22%)       | 0                | 0               | 0               | 0                |
| Activated sludge   | DNA      | Bacteria | 6225  | 1530 (24.6%)      | 328 (5.27%)     | 10 (0.16%)       | 2 (0.03%)       | 1 (0.02%)       | 1 (0.02%)        |
| Anaerobic digester | RNA      | Archaea  | 74    | 0                 | 0               | 0                | 0               | 0               | 0                |
| Anaerobic digester | RNA      | Bacteria | 235   | 33 (14.0%)        | 6 (2.55%)       | 0                | 0               | 0               | 0                |
| Anaerobic digester | DNA      | Bacteria | 4173  | 937 (22.5%)       | 222 (5.32%)     | 4 (0.096%)       | 1 (0.02%)       | 0               | 0                |
| Combined           | Combined | Archaea  | 75    | 0                 | 0               | 0                | 0               | 0               | 0                |
| Combined           | Combined | Bacteria | 9446  | 2434 (25.8%)      | 545 (5.77%)     | 15 (0.16%)       | 3 (0.03%)       | 1 (0.01%)       | 1 (0.01%)        |

630

631 **Table 2: Numbers and percentage of taxa which were assigned *de novo* names.**

| Environment        | Library  | Kingdom  | Species      | Genus        | Family      | Order      | Class      | Phylum    |
|--------------------|----------|----------|--------------|--------------|-------------|------------|------------|-----------|
| Activated sludge   | RNA      | Archaea  | 1 (50%)      | 0            | 0           | 0          | 0          | 0         |
| Activated sludge   | RNA      | Bacteria | 189 (88.7%)  | 47 (40.9%)   | 16 (22.5%)  | 5 (10.2%)  | 0          | 0         |
| Activated sludge   | DNA      | Bacteria | 2709 (92.6%) | 893 (71.2%)  | 180 (44.4%) | 45 (24.9%) | 9 (12.3%)  | 1 (2.94%) |
| Anaerobic digester | RNA      | Archaea  | 10 (58.8%)   | 0            | 0           | 0          | 0          | 0         |
| Anaerobic digester | RNA      | Bacteria | 117 (91.4%)  | 50 (51.6%)   | 21 (30.4%)  | 6 (12.0%)  | 3 (9.68%)  | 0         |
| Anaerobic digester | DNA      | Bacteria | 1760 (92.5%) | 595 (66.0%)  | 132 (43.9%) | 36 (23.1%) | 8 (11.43%) | 0         |
| Combined           | Combined | Archaea  | 10 (58.8%)   | 0            | 0           | 0          | 0          | 0         |
| Combined           | Combined | Bacteria | 3879 (93.3%) | 1284 (72.4%) | 260 (50%)   | 67 (29.9%) | 13 (14.4%) | 1 (2.44%) |

632

633 **Figures:**  
634

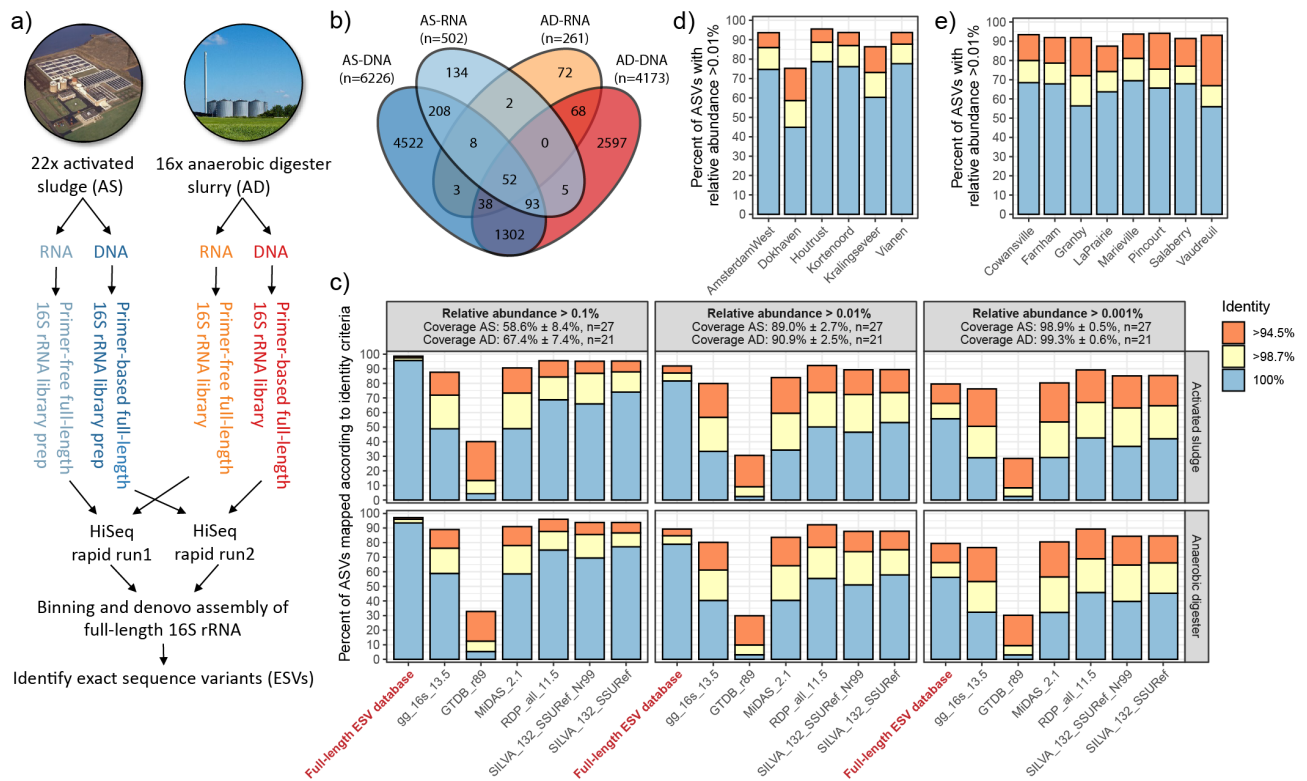

635

636 **Figure 1. Construction and evaluation of the full-length ESV reference database. a)**

637 Preparation of full-length ESVs. Samples were collected from WWTPs and anaerobic digesters, and  
 638 DNA and RNA were extracted. Purified DNA or RNA were used for preparation of primer-based  
 639 and “primer-free” full-length 16S rRNA libraries, respectively. These were sequenced and  
 640 processed bioinformatically to produce a comprehensive ecosystem-specific full-length ESV  
 641 database. A detailed description is provided in the supplementary results. b) Venn-diagram showing  
 642 bacterial ESVs shared between individual libraries. c) Mapping of V1-3 amplicon data to the full-  
 643 length ESV database and common 16S rRNA reference databases. ASVs were obtained from  
 644 activated sludge and anaerobic digester samples and filtered based on their relative abundance,  
 645 before the analysis to uncover the depth of the full-length ESV database. The fraction of the  
 646 microbial community represented by the remaining ASVs after the filtering (coverage) is shown as  
 647 mean ± standard deviation across plants. d) Mapping of ASVs from Dutch WWTPs based on raw  
 648 data from Gonzalez-Martinez et al. (Gonzalez-Martinez *et al.*, 2016). For details, see Figure S3. e)  
 649 Mapping of ASVs from Canadian WWTPs, based on raw data from Isazadeh et al. 2016 (Isazadeh  
 650 *et al.*, 2016). For details, see Figure S4.



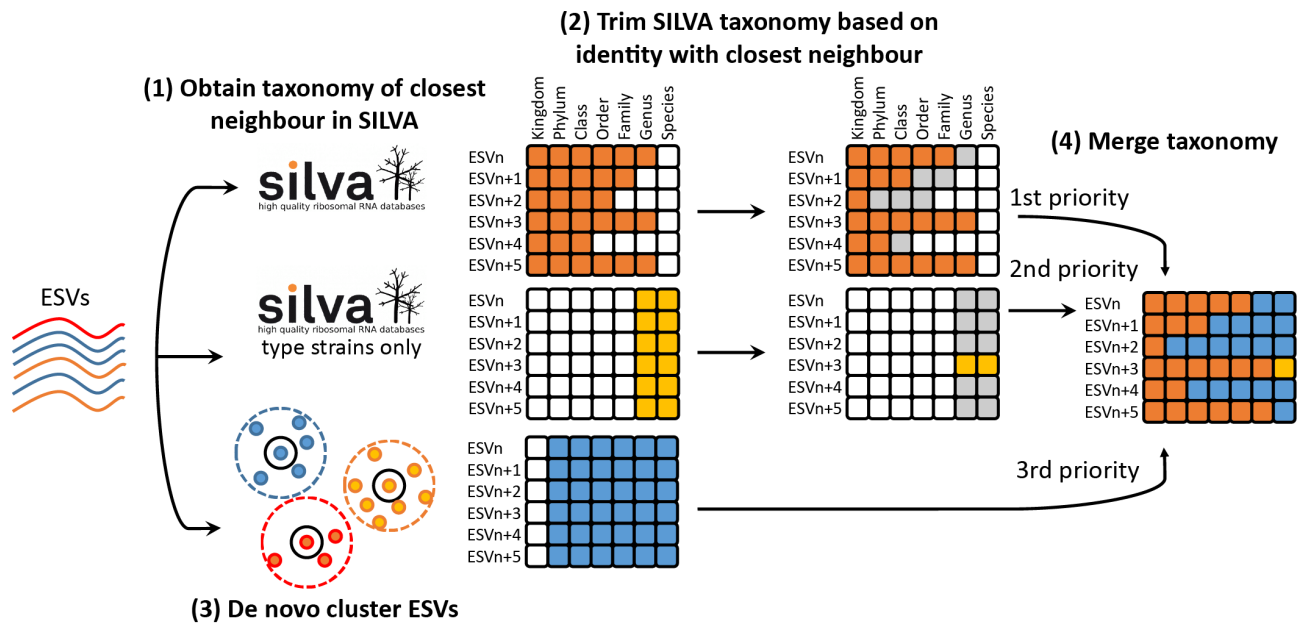

651

652

653

654

655

656

657

658

659

660

661

**Figure 2. The AutoTax taxonomic framework.** (1) Full-length ESVs were first mapped to the SILVA\_132\_SSURef\_Nr99 database to identify the closest relative and the shared percent identity. (2) Taxonomy was adopted from this sequence after trimming, based on percent identity and the taxonomic thresholds proposed by Yarza et al. (Yarza *et al.*, 2014). To gain species information, ESVs were also mapped to sequences from type strains extracted from the SILVA database, and species names were adopted if the identity was >98.7% and the type strain genus matched that of the closest relative in the complete database. (3) ESVs were also clustered by greedy clustering at different identities, corresponding to the thresholds proposed by Yarza et al. (Yarza *et al.*, 2014) to generate a stable *de novo* taxonomy. (4) Finally, a comprehensive taxonomy was obtained by filling gaps in the SILVA-based taxonomy with the *de novo*-taxonomy.

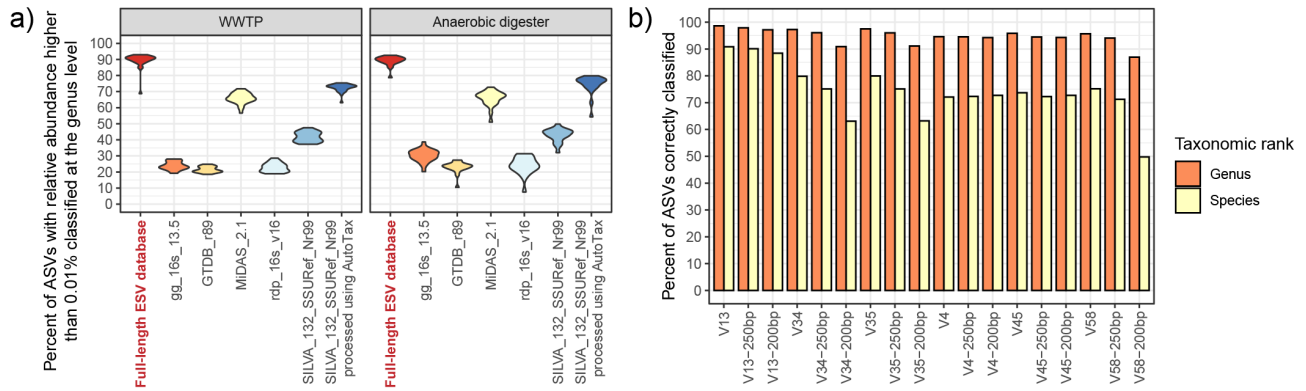

662

663 **Figure 3. Classification of amplicons.** a) Percentage of ASVs from each activated sludge and  
 664 anaerobic digester sample with a relative coverage of more than 0.01% that were classified to the  
 665 genus level when classified using the full-length ESV reference database, common reference  
 666 databases for taxonomic classification, and the SILVA databases processed using AutoTax. b)  
 667 Classification of *in silico* bacterial ASVs, corresponding to amplicons produced using common  
 668 primer set on the ESVs. Results are shown for the full amplicons as well as for partial amplicons,  
 669 equivalent to the first 250 or 200 bp. V13 (Lane 1991) (Lane, 1991), V34 (Klindworth et al. 2013)  
 670 (Klindworth *et al.*, 2013), V35 (Peterson et al. 2009) (Peterson *et al.*, 2009), V4 (Apprill et al. 2015)  
 671 (Apprill *et al.*, 2015), V45 (Parada et al. 2016) (Parada *et al.*, 2016), and V58 (Klindworth et al.  
 672 2013) (Klindworth *et al.*, 2013).

673

| ESV database                      |     | Silva_132_SSURef_Nr99 |     |      |     |      |     |     |     |     |     |     |     |     |     |     |     |     |     |     |     |     |     |      |     |     |                                      |                                  |  |
|-----------------------------------|-----|-----------------------|-----|------|-----|------|-----|-----|-----|-----|-----|-----|-----|-----|-----|-----|-----|-----|-----|-----|-----|-----|-----|------|-----|-----|--------------------------------------|----------------------------------|--|
| Tetrasphaera, ASV1-               | 7.3 | 2.7                   | 5.2 | 2.3  | 1.6 | 1.6  | 2.5 | 3.5 | 2   | 6.3 | 7.9 | 0.5 | 3.3 | 2.8 | 3.5 | 1.3 | 1   | 1   | 1.4 | 2.3 | 5.3 | 7.9 | 1.2 | 19.2 | 3.4 | 5.8 | Tetrasphaera, ASV1                   |                                  |  |
| denovo_g_1, ASV2-                 | 0   | 0.2                   | 0.4 | 16.8 | 7.6 | 11.7 | 3.3 | 3.8 | 0.2 | 0   | 0   | 0.1 | 0   | 0.7 | 0.4 | 0.1 | 2.6 | 3.9 | 0   | 0.1 | 0   | 0   | 0.1 | 0    | 0.1 | 0   | 0                                    | - NA, ASV2                       |  |
| Ca_Microthrix, ASV3-              | 1.9 | 4.5                   | 3.2 | 3.3  | 0.2 | 2.9  | 1.3 | 1   | 0.8 | 4.3 | 0   | 0.7 | 0.2 | 0.6 | 0.7 | 0.5 | 2.9 | 1.1 | 0   | 0.3 | 1.1 | 1.3 | 0.2 | 0.3  | 4.5 | 2.6 | - k_Bacteria, ASV3, ASV3             |                                  |  |
| Trichococcus, ASV13-              | 0.8 | 0.7                   | 0.9 | 0.9  | 0.9 | 0.7  | 1.4 | 0.6 | 0.3 | 0.3 | 0.3 | 1.1 | 0.7 | 0.8 | 0.8 | 1.3 | 1   | 0.6 | 1.2 | 1.4 | 0.6 | 0.9 | 0.2 | 1.3  | 0.7 | 0.8 | Trichococcus, ASV13                  |                                  |  |
| Ca_Microthrix, ASV4-              | 1.2 | 2                     | 2.3 | 0.2  | 1.4 | 0.8  | 0.7 | 0.4 | 0.4 | 0.3 | 0   | 0.3 | 0.6 | 0.1 | 0.8 | 0.8 | 0.3 | 1.9 | 0.5 | 1.5 | 1.2 | 0.3 | 0.2 | 1.5  | 0.2 | 1.6 | Candidatus_Microthrix, ASV4          |                                  |  |
| denovo_g_17, ASV7-                | 0.7 | 0.5                   | 1   | 0.3  | 0.7 | 0.8  | 0.3 | 0.5 | 0.8 | 1.6 | 1.1 | 0.8 | 0.6 | 0.4 | 0.4 | 1   | 1.1 | 0.8 | 0.4 | 0.8 | 1.4 | 0.6 | 1.6 | 1.1  | 1   | 0.2 | - f_Saprospiraceae, ASV7, ASV7       |                                  |  |
| denovo_g_471, ASV10-              | 2.1 | 0.5                   | 0.7 | 0.2  | 0.7 | 0.9  | 0.5 | 0.8 | 2.6 | 0.7 | 0.2 | 1.4 | 0.5 | 0.7 | 0.5 | 2.4 | 1.5 | 0.6 | 0.4 | 1.1 | 0.5 | 0.3 | 0.1 | 0.2  | 0.1 | 0.4 | - f_Anaerolineaceae, ASV10, ASV10    |                                  |  |
| Tetrasphaera, ASV6-               | 0.1 | 0.5                   | 0.7 | 0.5  | 1.1 | 1.3  | 0.4 | 0.6 | 0.7 | 0.5 | 0.1 | 0.1 | 0.1 | 1.6 | 0.8 | 1.1 | 0.1 | 0.3 | 0.7 | 0.2 | 1.4 | 1.9 | 0.3 | 0.2  | 2.8 | 0.6 | Tetrasphaera, ASV6                   |                                  |  |
| Ferritribacterium, ASV9-          | 0.1 | 0                     | 0   | 0    | 0   | 0.1  | 0.1 | 5   | 2.9 | 0.1 | 0.4 | 0   | 0   | 0   | 0   | 0   | 0   | 0.2 | 1.4 | 0   | 0.8 | 1   | 0   | 0.1  | 0   | 5.7 | 0.4                                  | - Dechloromonas, ASV9            |  |
| Tetrasphaera, ASV5-               | 0   | 0.1                   | 0.1 | 0.4  | 0.5 | 0.3  | 0.1 | 0.2 | 0.2 | 0.4 | 2   | 0.3 | 0.8 | 1.6 | 0.7 | 0   | 0   | 0   | 2.9 | 0   | 0.4 | 0.9 | 0.3 | 0.1  | 1.3 | 3.6 | - Tetrasphaera, ASV5                 |                                  |  |
| denovo_g_6, ASV14-                | 0   | 0.3                   | 0   | 0.1  | 1.1 | 0.7  | 0.1 | 0.2 | 0   | 0   | 0   | 0   | 1.4 | 1.1 | 0   | 0   | 0.1 | 3.5 | 5.6 | 0   | 0   | 0   | 0   | 0    | 0   | 0.6 | 0.3                                  | - f_Saprospiraceae, ASV14, ASV14 |  |
| Nitrospira, ASV11-                | 0.1 | 0.3                   | 0.3 | 0.1  | 0.6 | 0.5  | 0.3 | 0.1 | 0.8 | 1.7 | 0.2 | 0.1 | 0   | 1.1 | 0.5 | 0   | 0.1 | 1.1 | 0.2 | 0.7 | 2.2 | 0.3 | 0.2 | 0.1  | 2.1 | 1.1 | Nitrospira, ASV11                    |                                  |  |
| f_Burkholderiaceae, ASV93, ASV93- | 0.2 | 0.2                   | 0.2 | 0.3  | 0.2 | 0.1  | 0.6 | 0.6 | 0.2 | 1   | 0   | 1   | 0.6 | 0.1 | 0.5 | 2.1 | 2.8 | 0   | 0.2 | 0.6 | 0.1 | 0.4 | 1.4 | 0.2  | 0.1 | 0.4 | - f_Burkholderiaceae, ASV93, ASV93   |                                  |  |
| Dechloromonas, ASV15-             | 0   | 0.5                   | 0.2 | 2.5  | 0.1 | 0.6  | 0.1 | 1.6 | 0.5 | 0   | 0   | 0.3 | 0.2 | 1.2 | 0   | 0.2 | 0.4 | 1.8 | 0.1 | 0.2 | 1.1 | 0   | 0   | 0    | 0   | 0.7 | 1                                    | - Dechloromonas, ASV15           |  |
| Rhodobacter, ASV12-               | 0.7 | 0.5                   | 0.9 | 0.2  | 0.2 | 0.4  | 0.4 | 0.5 | 0.6 | 0.8 | 0.1 | 0.2 | 0.5 | 0.4 | 1.2 | 0.6 | 0.3 | 0.7 | 0   | 0.2 | 0.9 | 0.6 | 0.4 | 0.8  | 0.9 | 0.3 | - Rhodobacter, ASV12                 |                                  |  |
| f_Burkholderiaceae, ASV75, ASV75- | 0.4 | 0.6                   | 0.2 | 0.6  | 0.5 | 0.4  | 0.8 | 0.4 | 0.6 | 0.3 | 0   | 0.7 | 0.3 | 0.4 | 0.4 | 0.9 | 0.7 | 0.5 | 0.7 | 1   | 0.4 | 0.3 | 0.2 | 0.4  | 1.2 | 0.4 | - f_Burkholderiaceae, ASV75, ASV75   |                                  |  |
| Tetrasphaera, ASV30-              | 0   | 0.2                   | 0   | 0    | 0   | 0    | 0.1 | 0.3 | 0.9 | 2.2 | 0.2 | 0   | 1.7 | 0   | 0   | 0   | 0   | 0   | 0   | 0   | 0   | 0.3 | 6.1 | 0.9  | 0   | 0.1 | - Tetrasphaera, ASV30                |                                  |  |
| Acidovorax, ASV23-                | 0.8 | 0.4                   | 0.1 | 0.5  | 0.5 | 0.2  | 0.9 | 0.2 | 0.1 | 0   | 0.1 | 1.4 | 0.4 | 0.3 | 0.5 | 1   | 0.7 | 0.3 | 0.2 | 1.2 | 0.2 | 0.8 | 0.1 | 0.9  | 0.1 | 0.2 | - Acidovorax, ASV23                  |                                  |  |
| Rhodoferrax, ASV21-               | 0.7 | 0.9                   | 0.5 | 0.2  | 0.1 | 0.2  | 0.8 | 0.4 | 0.1 | 0.4 | 0   | 0.3 | 0.6 | 0.1 | 0.3 | 0.9 | 0.9 | 0.4 | 0.2 | 0.6 | 0.3 | 0.6 | 0.4 | 0.5  | 0.6 | 0.2 | - Rhodoferrax, ASV21                 |                                  |  |
| Rhodobacter, ASV26-               | 0.3 | 0.6                   | 0.2 | 0.1  | 0.2 | 0.3  | 0.1 | 0.2 | 0.6 | 1   | 0   | 0.4 | 0.7 | 1   | 0.5 | 0.2 | 0.1 | 0.5 | 0.4 | 0.3 | 1.6 | 0.1 | 0   | 0.3  | 0.6 | 0.8 | - f_Rhodobacteriaceae, ASV26, ASV26  |                                  |  |
| Simplicispira, ASV38-             | 0.2 | 0.6                   | 0.7 | 0    | 0   | 0.2  | 0.6 | 0.5 | 0.6 | 2.4 | 0   | 0   | 0   | 0.5 | 0.2 | 0.2 | 0.3 | 0.8 | 0.1 | 0.4 | 0.7 | 0.1 | 0   | 0.1  | 0.4 | 0.6 | - f_Burkholderiaceae, ASV38, ASV38   |                                  |  |
| Propionimonas, ASV19-             | 0   | 0.7                   | 0.1 | 0    | 0   | 0    | 0   | 0.4 | 0   | 0   | 0.7 | 0   | 0.8 | 2   | 0   | 0   | 0   | 0   | 0   | 3.1 | 0.1 | 0   | 0.4 | 0    | 0.1 | 1.6 | - Propionimonas, ASV19               |                                  |  |
| Trichococcus, ASV52-              | 0.4 | 0.3                   | 0.4 | 0.4  | 0.4 | 0.3  | 0.7 | 0.3 | 0.1 | 0.1 | 0.1 | 0.5 | 0.3 | 0.4 | 0.4 | 0.6 | 0.4 | 0.3 | 0.6 | 0.6 | 0.3 | 0.4 | 0.1 | 0.6  | 0.3 | 0.4 | - Trichococcus, ASV52                |                                  |  |
| denovo_g_70, ASV29-               | 0.2 | 0.5                   | 0.8 | 1    | 0.9 | 1.3  | 0.6 | 0.2 | 0   | 0   | 0   | 0   | 0.8 | 0.4 | 0.9 | 0.2 | 0.1 | 0.3 | 0.6 | 0   | 0.1 | 0.5 | 0   | 0.2  | 0   | 0.1 | - NA, ASV29                          |                                  |  |
| denovo_g_119, ASV28-              | 2   | 0.1                   | 0.2 | 0.2  | 0.2 | 0.4  | 0.1 | 0.3 | 0.2 | 0.5 | 0   | 0.9 | 0.2 | 0.1 | 0.4 | 0.1 | 1   | 0.1 | 0   | 0.3 | 0   | 0   | 1   | 0.8  | 0.1 | 0.3 | - NA, ASV28                          |                                  |  |
| Dechloromonas, ASV20-             | 0.1 | 0.7                   | 0.1 | 0.5  | 0.2 | 0.5  | 0.3 | 0.1 | 0.7 | 0.3 | 0   | 0.2 | 0.2 | 2.6 | 0.4 | 0   | 0   | 0.4 | 0.8 | 0.3 | 0.6 | 0.1 | 0   | 0    | 0   | 0   | 0.1                                  | - Dechloromonas, ASV20           |  |
| Bradyrhizobium, ASV22-            | 0.5 | 0.6                   | 0.3 | 0.3  | 0.5 | 0.5  | 0.3 | 0.4 | 0.6 | 0.2 | 0.3 | 0.2 | 0.4 | 0.3 | 0.2 | 0.1 | 0.3 | 0.4 | 0.3 | 0.5 | 0.6 | 0.3 | 0.1 | 0.3  | 0.3 | 0.4 | - f_Xanthobacteraceae, ASV22, ASV22  |                                  |  |
| denovo_g_20, ASV55-               | 0.5 | 0.7                   | 0.4 | 0.2  | 0.2 | 0.2  | 0.1 | 0.3 | 0.1 | 0.1 | 0   | 0.6 | 0.3 | 0   | 0.4 | 0.5 | 1.6 | 0.5 | 0.1 | 0.2 | 0   | 0.7 | 0.3 | 0.2  | 0.5 | 0.1 | - f_Saprospiraceae, ASV55, ASV55     |                                  |  |
| Defluviococcus, ASV33-            | 0   | 0                     | 0   | 0    | 0   | 0    | 0   | 0.1 | 0   | 0   | 8.8 | 0   | 0   | 0   | 0   | 0   | 0   | 0   | 0   | 0   | 0   | 0   | 0   | 0    | 0   | 0   | 0                                    | - Defluviococcus, ASV33          |  |
| denovo_g_425, ASV37-              | 0.5 | 0.4                   | 0.1 | 0.2  | 0.5 | 0.1  | 0.6 | 0.3 | 0.1 | 0.1 | 0   | 0.3 | 0.8 | 0   | 0.3 | 0.5 | 0.3 | 0.5 | 0.4 | 0.2 | 0   | 0.6 | 0.8 | 1    | 0   | 0.2 | - NA, ASV37                          |                                  |  |
| Ca_Microthrix, ASV18-             | 0.3 | 0.4                   | 2.5 | 0.2  | 0.3 | 1.1  | 0.4 | 0.3 | 0.1 | 0.1 | 0   | 0.2 | 0   | 0   | 0.5 | 0.3 | 0.2 | 0.3 | 0   | 0.3 | 0.1 | 0.1 | 0.1 | 0.4  | 0.1 | 0.2 | - Candidatus_Microthrix, ASV18       |                                  |  |
| Romboutsia, ASV17-                | 0.4 | 0.3                   | 0.5 | 0.2  | 0.4 | 0.4  | 0.3 | 0.3 | 0.4 | 0.3 | 0.1 | 0.3 | 0.2 | 0.4 | 0.3 | 0.3 | 0.2 | 0.5 | 0.4 | 0.3 | 0.5 | 0.2 | 0.1 | 0.4  | 0.2 | 0.2 | - o_Clostridiales, ASV17, ASV17      |                                  |  |
| denovo_g_31, ASV44-               | 0.4 | 0                     | 0.3 | 0.6  | 0.1 | 0.2  | 0.3 | 0.4 | 0.1 | 0.3 | 0   | 0.4 | 0.2 | 0   | 0.8 | 1.3 | 0.5 | 0.2 | 0.2 | 0.3 | 0.2 | 0.5 | 0.1 | 0.3  | 0   | 0   | - NA, ASV44                          |                                  |  |
| OLB8, ASV45-                      | 1.1 | 0.2                   | 0.3 | 0.1  | 0.1 | 0.2  | 0.4 | 0.3 | 0.2 | 0.3 | 0   | 0.2 | 0.4 | 0.5 | 0.6 | 0.2 | 0.1 | 0.2 | 0.2 | 0.5 | 0.8 | 0.1 | 0.2 | 0.3  | 0.1 | 0.1 | - OLB8, ASV45                        |                                  |  |
| f_Burkholderiaceae, ASV50, ASV50- | 0.2 | 0.8                   | 0.1 | 0    | 0.1 | 0    | 0.6 | 0.1 | 1   | 0.1 | 0   | 0.1 | 0.4 | 0.1 | 0.4 | 0.2 | 0.2 | 0.4 | 0.1 | 0.4 | 1   | 0   | 0   | 0.1  | 0.9 | 0.5 | - f_Burkholderiaceae, ASV50, ASV50   |                                  |  |
| Leptothrix, ASV121-               | 0.2 | 0.8                   | 0.6 | 0.3  | 0.3 | 0.6  | 0.2 | 0.5 | 0.4 | 0.1 | 0.2 | 0.1 | 0.1 | 0.2 | 0.1 | 0.1 | 0.5 | 0.5 | 0.1 | 0.1 | 0.2 | 0.3 | 0   | 0    | 0.2 | 0.8 | - f_Burkholderiaceae, ASV121, ASV121 |                                  |  |
| Ferruginibacter, ASV47-           | 0   | 0.4                   | 0.5 | 0.2  | 0.2 | 0.5  | 0   | 0.1 | 0.7 | 0   | 0   | 0.3 | 0   | 0.5 | 0   | 0   | 0.1 | 0.2 | 0.2 | 0   | 2.2 | 0.1 | 0   | 0    | 1   | 0   | - Ferruginibacter, ASV47             |                                  |  |
| denovo_g_59, ASV51-               | 0.4 | 0.2                   | 0.2 | 0.1  | 0.4 | 0.2  | 0.1 | 0.2 | 0.2 | 0.3 | 0.3 | 0.3 | 0.4 | 0.6 | 0.1 | 0.1 | 0.7 | 0.2 | 0.3 | 0.2 | 0.1 | 0.5 | 0.3 | 0.2  | 0.2 | 0.2 | - f_Sphingomonadaceae, ASV51, ASV51  |                                  |  |
| Fodinicola, ASV41-                | 0   | 0.1                   | 0   | 0.6  | 1.4 | 0.7  | 0.5 | 0   | 0   | 0   | 0   | 0   | 0.1 | 0.7 | 0   | 0   | 0   | 0   | 0   | 1.7 | 0.8 | 0   | 0   | 0    | 0   | 0   | - Fodinicola, ASV41                  |                                  |  |
| denovo_g_5, ASV69-                | 0   | 0.1                   | 0.2 | 0.1  | 0   | 0.2  | 0   | 0.1 | 0.4 | 0.4 | 1   | 0.1 | 0.8 | 0.1 | 0   | 0.1 | 0.1 | 0.4 | 0   | 0   | 0.3 | 1.5 | 0.1 | 0.6  | 0   | 0   | - f_Intrasporangiaceae, ASV69, ASV69 |                                  |  |
| Uliginosibacterium, ASV78-        | 0.3 | 0.1                   | 0   | 0.3  | 0.2 | 0.4  | 0.9 | 0   | 0   | 0.2 | 0.4 | 0.2 | 0   | 0.2 | 0.6 | 0.9 | 0.1 | 0.4 | 0.7 | 0.2 | 0.2 | 0   | 0.1 | 0    | 0.1 | 0.1 | - Uliginosibacterium, ASV78          |                                  |  |
| denovo_g_52, ASV31-               | 0.1 | 0                     | 0   | 0    | 0.3 | 0    | 0.1 | 0.1 | 0.3 | 0.3 | 0.1 | 0.2 | 0.4 | 0.1 | 0.9 | 0.1 | 0.1 | 0.9 | 0.2 | 0.4 | 0   | 0   | 0.5 | 1    | 0   | 0.4 | - f_67-14, ASV31, ASV31              |                                  |  |
| Rhodobacter, ASV58-               | 0.1 | 0.5                   | 1   | 0.5  | 0   | 0.6  | 0.2 | 0.6 | 0   | 0   | 0.1 | 0   | 0.9 | 0   | 0   | 0.3 | 0.3 | 0.1 | 0   | 0   | 0   | 0.5 | 0.1 | 0.1  | 0.3 | 0   | - f_Rhodobacteriaceae, ASV58, ASV58  |                                  |  |
| denovo_g_33, ASV80-               | 0.1 | 0.2                   | 0.3 | 0.2  | 0.1 | 0.2  | 0.7 | 0.3 | 0   | 0.3 | 0.1 | 0.1 | 0.2 | 0.2 | 0.2 | 0.7 | 0.2 | 0.2 | 0.2 | 0.1 | 0.3 | 0.5 | 0   | 0.1  | 0.2 | 0.4 | - f_Burkholderiaceae, ASV80, ASV80   |                                  |  |
| denovo_g_33, ASV81-               | 0.3 | 0.2                   | 0.3 | 0.1  | 0.1 | 0.2  | 0.3 | 0.2 | 0.1 | 0.4 | 0   | 0.3 | 0.2 | 0.2 | 0.5 | 0.2 | 0.4 | 0.2 | 0.3 | 0.2 | 0.3 | 0.4 | 0.1 | 0.2  | 0.4 | 0.4 | - f_Burkholderiaceae, ASV81, ASV81   |                                  |  |
| denovo_g_81, ASV202-              | 0   | 0.1                   | 0.1 | 0    | 0.1 | 0.1  | 0   | 0.2 | 0.3 | 0.5 | 0   | 0.2 | 0   | 0.3 | 0.2 | 0   | 1   | 0.3 | 0.7 | 0.5 | 0.4 | 0   | 0.6 | 0.1  | 0   | 0.3 | - f                                  |                                  |  |
