# Comprehensive ecosystem-specific 16S rRNA gene databases with automated taxonomy assignment (AutoTax) provide species-level resolution in microbial ecology

**Authors:** Morten Simonsen Dueholm, Kasper Skytte Andersen, Francesca Petriglieri, Simon Jon McIlroy\*\*, Marta Nierychlo, Jette Fisher Petersen, Jannie Munk Kristensen, Erika Yashiro, Søren Michael Karst, Mads Albertsen, Per Halkjær Nielsen\*

## **Affiliation:**

Center for Microbial Communities, Department of Chemistry and Bioscience, Aalborg University, Aalborg, Denmark.

\*Correspondence to: Per Halkjær Nielsen, Center for Microbial Communities, Department of Chemistry and Bioscience, Aalborg University, Fredrik Bajers Vej 7H, 9220 Aalborg, Denmark; Phone: (+45) 9940 8503; Fax: Not available; E-mail: [phn@bio.aau.dk](mailto:phn@bio.aau.dk)

\*\***Present address:** Australian Centre for Ecogenomics, School of Chemistry and Molecular Biosciences, University of Queensland, 4072 Brisbane, Australia.

## **Running title:**

Species-level resolution in microbial ecology

## 21    **Abstract**

22    High-throughput 16S rRNA gene amplicon sequencing is an indispensable method for studying the  
 23    diversity and dynamics of microbial communities. However, this method is presently hampered by  
 24    the lack of high-identity reference sequences for many environmental microbes in the public 16S  
 25    rRNA gene reference databases, and by the lack of a systematic and comprehensive taxonomic  
 26    classification for most environmental bacteria. Here we combine high-quality and high-throughput  
 27    full-length 16S rRNA gene sequencing with a novel sequence identity-based approach for  
 28    automated taxonomy assignment (AutoTax) to create robust, near-complete 16S rRNA gene  
 29    databases for complex environmental ecosystems. To demonstrate the benefit of the approach, we  
 30    created an ecosystem-specific database for wastewater treatment systems and anaerobic digesters.  
 31    The novel approach allows consistent species-level classification of 16S rRNA amplicons sequence  
 32    variants (ASVs) and the design of highly specific oligonucleotide probes for fluorescence *in situ*  
 33    hybridization, which can reveal *in situ* properties of microbes at unprecedented taxonomic  
 34    resolution.

# 35 **Introduction:**

36 Microbial communities determine the functions of microbial ecosystems in nature and engineered  
 37 systems. A deep understanding of the communities requires reliable identification of the microbes  
 38 present, as well as linking their identity with functions. Identification at the lowest taxonomic rank  
 39 is preferred, as microbial traits vary in their degree of phylogenetic conservation, and many  
 40 ecologically important traits are conserved only at the genus to species rank (Martiny *et al.*, 2015).

41 Identification of microbes is commonly achieved by high-throughput 16S rRNA gene  
 42 amplicon sequencing, where a segment of the 16S rRNA gene spanning one to three hypervariable  
 43 regions is amplified by PCR and sequenced. The amplicons are then clustered, based on sequence  
 44 identity into operational taxonomic units (OTUs) or used to infer exact amplicon sequence variants  
 45 (ASVs), also known as sub-OTUs (sOTUs) or zero-radius OTUs (zOTUs), with denoising  
 46 algorithms such as Deblur (Single- and Sequence, 2017), DADA2 (Callahan *et al.*, 2016), or  
 47 Unoise3 (Edgar, 2016b). The sequences are finally classified, based on a 16S rRNA gene reference  
 48 database to assign the most plausible taxonomy for each sequence (Caporaso *et al.*, 2010). ASVs  
 49 are often preferred over OTUs, because they provide the highest phylogenetic resolution, supporting  
 50 sub-genus to sub-species level classification, depending on the 16S rRNA gene region amplified  
 51 and the taxon analyzed (Callahan *et al.*, 2017).

52 ASVs can be applied as consistent labels for microbial identification independently of a 16S  
 53 rRNA gene reference database (Callahan *et al.*, 2017). This approach is used in several large-scale  
 54 projects, including the Earth Microbiome Project (EMP) (Thompson *et al.*, 2017) and the American  
 55 Gut project (McDonald *et al.*, 2018), to provide detailed insight into the factors that shape the  
 56 overall microbial community diversity and dynamics. However, ASVs are not ideal as references  
 57 for linking microbial identity with functions. Firstly, ASVs do not contain enough evolutionary  
 58 information to confidently resolve their phylogeny (Yarza *et al.*, 2014; Edgar, 2018), which makes

it impossible to report and infer how microbial traits are conserved at different phylogenetic scales. Secondly, comparison of ASVs is only possible when they are produced and processed in the same way. This means that, without taxonomic assignment, it is not possible to compare results across studies that have used primer sets targeting different regions of the 16S rRNA gene. It also hampers our ability to exploit the power of new and improved sequencing technologies that can produce longer reads of high quality. Finally, if information about functional properties is available from pure culture studies or *in situ* studies based on metagenome assembled genomes (MAGs), this information may be linked to full-length 16S rRNA sequences, but less reliably to ASVs (Yarza *et al.*, 2014; Edgar, 2018). Taxonomic assignment is therefore crucial for cross-study comparisons and the dissemination of microbial knowledge.

Taxonomic assignment to ASVs relies on the classifier (e.g., *sintax* (Edgar, 2016a) or RDP classifier (Wang *et al.*, 2007)) that applies different algorithms to compare each individual ASV to a 16S rRNA gene reference database and proposes the best estimate for the taxonomy. Confident classification at the lowest taxonomic ranks requires high-identity reference sequences (~100% identity) and a comprehensive taxonomy for all references (Edgar, 2018). None of these criteria are met with the commonly applied universal reference databases (Greengenes (Desantis *et al.*, 2006), SILVA (Quast *et al.*, 2013), and RDP (Cole *et al.*, 2014)), which lack sequences for many environmental taxa and a comprehensive taxonomy for most uncultivated taxa.

A solution to the aforementioned problems is to create ecosystem-specific reference databases. Some well-studied medium-complexity ecosystems, such as the human gut (Ritari *et al.*, 2015) or oral microbiomes (Chen *et al.*, 2010; Griffen *et al.*, 2011), now have fairly comprehensive reference databases with genus- to species-level resolution, which were obtained from thousands of isolates and MAGs (Ritari *et al.*, 2015; Segota and Long, 2019; Chen *et al.*, 2010). However, this is not yet the case for most environmental ecosystems.

New methods for high-throughput full-length 16S rRNA gene sequencing, e.g., synthetic long-read sequencing on the Illumina platform (Karst *et al.*, 2018; Burke and Darling, 2016), but also emerging methods such as PacBio (Callahan *et al.*, 2019) and Nanopore (Karst *et al.*, 2019) consensus sequencing, now allow generation of millions of high-quality reference sequences from any environmental ecosystem. This can provide high-identity references for many of the uncultured taxa which are currently missing in the large universal reference databases. However, it does not solve the problem of missing or poor taxonomic assignment for many taxa.

Current strategies for generating and maintaining ecosystem-specific taxonomies involve ecosystem-specific curated versions of universal reference databases, where the taxonomy is manually curated for some process-critical microbes, and placeholder names are provided for the most abundant uncultured genera. Examples are the MiDAS database for microbes in biological wastewater treatment systems (McIlroy *et al.*, 2017) and the Dictyopteran gut microbiota reference Database (DictDb) (Mikaelyan *et al.*, 2015). Another approach is to develop smaller ecosystem-specific databases that only include sequences from the specific ecosystem, with the taxonomy rigorously curated by scientists within the field such as the freshwater-specific FreshTrain database (Newton *et al.*, 2011; Rohwer *et al.*, 2018), the honey bee gut microbiota database (Newton and Roeselers, 2012), and the rumen and intestinal methanogen database (Seedorf *et al.*, 2014). Such ecosystem-specific databases greatly improve classification of amplicons that have a suitable reference in the database, but this may not be the case for a large fraction of the community. Furthermore, manual ecosystem-specific curation of the reference databases is subjective and hardly sustainable if we want to expand the databases so that they cover the true diversity of the ecosystems at high taxonomic resolution, which would probably require 100-1000 times more sequences (Glöckner *et al.*, 2017).

Ideally, we want an automated taxonomy assignment that can provide robust, objective taxonomic classifications for all 16S rRNA gene reference sequences, based on the most recent microbial taxonomy with introduction of placeholder names for taxa which have not yet received official names. To achieve this, we introduce AutoTax - a simple and efficient strategy to create a comprehensive ecosystem-specific taxonomy covering all taxonomic ranks. AutoTax uses the SILVA taxonomy as a backbone and provides robust placeholder names for unclassified taxa, based on *de novo* clustering of sequences according to statistically supported identity thresholds for each taxonomic rank (Yarza *et al.*, 2014). Due to the strict computational nature of the taxonomy assignment, we obtain an objective taxonomy, which can easily be updated, based on the most recent version of the SILVA reference database.

We demonstrate the potential of the method by sequencing almost a million full-length small subunit rRNA gene (fSSU) sequences from Danish bioenergy and biological wastewater treatment systems and use these after error correction to create a new comprehensive ecosystem-specific reference database with 9,521 full-length exact sequence variants (ESVs), which were classified using AutoTax. The value of the new approach was demonstrated by comparing the performance of the ESV database with the large universal reference database commonly applied. The comprehensive set of full-length ESVs also allowed the design of species or sequence variant-specific oligonucleotide probes for fluorescence *in situ* hybridization (FISH). This was exemplified by new probes for one of the most abundant genera in Danish wastewater treatment systems, the *Tetrasphaera*, where it enabled the visual distinction of several species revealing different phenotypes.

## 127 **Materials and methods:**

### 128 **General molecular methods**

129 Concentration and quality of nucleic acids were determined using a Qubit 3.0 fluorometer (Thermo  
130 Fisher Scientific) and an Agilent 2200 Tapestation (Agilent Technologies), respectively. Agencourt  
131 RNAClean XP and AMPure XP beads were used as described by the manufacturer, except for the  
132 washing steps, where 80% ethanol was used. RiboLock RNase inhibitor (Thermo Fisher Scientific)  
133 was added to the purified total RNA to minimise RNA degradation. All commercial kits were used  
134 according to the protocols provided by the manufacturer, unless otherwise stated. Oligonucleotides  
135 used in this study can be found in **Table S1**.

### 137 **Samples and nucleic purification**

138 Activated sludge and anaerobic digester biomass were obtained as frozen aliquots (-80°C) from the  
139 MiDAS collection (McIlroy *et al.*, 2017). Sample metadata is provided in **Table S2**. Total nucleic  
140 acids were purified from 500 µL of sample thawed on ice using the PowerMicrobiome RNA  
141 isolation kit (MO BIO Laboratories) with the optional phenol-based lysis or with the RiboPure  
142 RNA purification kit for bacteria (Thermo Fisher Scientific). Purification was carried out according  
143 to the manufacturers' recommendations, except that cell lysis was performed in a FastPrep-24  
144 instrument for 4x 40 s at 6.0 m/s to increase the yield of nucleic acids from bacteria with tough cell  
145 walls (Albertsen *et al.*, 2015). The samples were incubated on ice for 2 min between each bead  
146 beating to minimise heating due to friction. DNA-free total RNA was obtained by treating a  
147 subsample of the purified nucleic acid with the DNase Max kit (MO BIO Laboratories), followed  
148 by clean up using 1.0x RNAClean XP beads with elution into 25 µL nuclease-free water.

## **Primer-free full-length 16S rRNA library preparation and sequencing**

Purified RNA obtained from biomass samples was pooled for each sample source type (activated sludge or anaerobic digester) to give equimolar amounts of the small subunit ribosomal ribonucleic acid (SSU rRNA) determined based on peak area in the TapeStation analysis software A.02.02 (SR1). Full-length SSU sequencing libraries were then prepared as previously described (Karst *et al.*, 2018). The SSU\_rRNA\_RT2 (activated sludge) and SSU\_rRNA\_RT3 (anaerobic digester biomass) reverse transcription primer and the SSU\_rRNA\_1 adaptor were used for the molecular tagging, and approximately 1,000,000 tagged molecules from each pooled sample were used to create the clonal library. The final library was sequenced on a HiSeq2500 using on-board clustering and rapid run mode with a HiSeq PE Rapid Cluster Kit v2 (Illumina) and HiSeq Rapid SBS Kit v2, 265 cycles (Illumina), as previously described (Karst *et al.*, 2018).

## **Primer-based full-length 16S rRNA library preparation and sequencing**

The purified nucleic acids obtained from the biomass samples were pooled for each sample source type (activated sludge or anaerobic digester) with equal weight of DNA from each sample. Full-length SSU sequencing libraries were then prepared, as previously described (Karst *et al.*, 2018). The f16S\_rDNA\_pcr1\_fw1 (activated sludge) or f16S\_rDNA\_pcr1\_fw2 (anaerobic digester biomass) and the f16S\_rDNA\_pcr1\_rv were used for the molecular tagging, and approximately 1,000,000 tagged molecules from each pooled sample were used to create the clonal library. The final library was sequenced on a HiSeq2500 using on-board clustering and rapid run mode with a HiSeq PE Rapid Cluster Kit v2 (Illumina) and HiSeq Rapid SBS Kit v2, 265 cycles (Illumina) as previously described (Karst *et al.*, 2018).



## **Preparation of full-length 16S rRNA gene exact sequence variants (ESVs)**

Raw sequence reads were binned, based on the unique molecular tags, *de novo* assembled into the synthetic long-read rRNA gene sequences using the fSSU-pipeline-DNA\_v1.2.sh or fSSU-pipeline-RNA\_v1.2.sh scripts script (<https://github.com/KasperSkytte/AutoTax>) (Karst *et al.*, 2018). The assembled 16S rRNA gene sequences were trimmed equivalent to *E. coli* position 8 and 1507 (RNA-based protocol) or 28 and 1491 (DNA-based protocol), as previously described (Karst *et al.*, 2018). This ensures that the sequences have equal length and that primer binding sites are removed from the DNA-based sequences. The trimmed sequences were oriented according to the SILVA\_132\_SSURef\_Nr99 database (Quast *et al.*, 2013) using the usearch11 -orient command, dereplicated using usearch11 -fastx\_uniques -sizeout and denoised with usearch11 -unoise3 -minsize 2 to produce "error-free" full-length ESVs. For details see the supplementary results.

## **Taxonomy assignment to full-length ESVs**

A complete taxonomy from kingdom to species was automatically assigned to each full-length ESV using the AutoTax.sh scripts (<https://github.com/KasperSkytte/AutoTax>). In brief, this script identifies the closest relative of each ESV in the SILVA database using usearch, obtains the taxonomy for this sequence, and discards information at taxonomic ranks not supported by the sequence identity, based on the thresholds for taxonomic ranks proposed by Yarza *et al.* (Yarza *et al.*, 2014). In addition, full-length ESVs were *de novo* clustered using the UCLUST algorithm and the same thresholds. The *de novo* clusters were labelled based on number of the centroid ESV, and these labels acted as a placeholder taxonomy, where there were gaps in the taxonomy obtained from SILVA. For details, see the supplementary results.

## Amplicon sequencing and analysis

Bacterial community analysis was performed by amplicon sequencing of the V1-3 variable region as previous described (Kirkegaard *et al.*, 2017) using the 27F (AGAGTTTGATCCTGGCTCAG) (Lane, 1991) and 534R (ATTACCGCGGCTGCTGG) (Muyzer *et al.*, 1993) primers and the purified DNA from above. Forward reads were processed using usearch v.11.0.667. Raw fastq files were filtered for phiX sequences using -filter\_phix, trimmed to 250 bp using -fastx\_truncate -truncLen 250, and quality filtered using -fastq\_filter with -fastq\_maxee 1.0. The sequences were dereplicated using -fastx\_uniques with -sizeout -relabel Uniq. Exact amplicon sequence variants (ASVs) were generated using -unoise3 (Edgar, 2016b). ASV-tables were created by mapping the raw reads to the ASVs using -otutab with the -zotus and -strand both options. Taxonomy was assigned to ASVs using -sintax with -strand both and -sintax\_cutoff 0.8 (Edgar, 2018).

## Data analysis and visualization

Usearch v.11.0.667 was used for mapping sequences to references with -usearch\_global -id 0 -maxrejects 0 -maxaccepts 0 -top\_hit\_only -strand plus, unless otherwise stated. Data was imported into R (R Core Team, 2016) using RStudio IDE (RStudio Team, 2015), analysed, and aggregated using Tidyverse v.1.2.1 (<https://www.tidyverse.org/>), and visualised using ggplot2 (Wickham, 2009) v.3.1.0 and Ampvis (Andersen *et al.*, 2018) v.2.4.0.

## 211 **Data availability**

212 Raw and assembled sequencing data is available at the European Nucleotide Archive  
213 (<https://www.ebi.ac.uk/ena>) under the project number PRJEB26558. The AutoTax script and  
214 processed reference databases in syntax and qiime format can be found at  
215 <https://github.com/KasperSkytte/AutoTax>.

## 217 **Fluorescence *in situ* hybridization (FISH)**

218 Fresh biomass samples from full-scale activated sludge WWTP were fixed with 96% ethanol and  
219 stored in the freezer (-20°C) until needed. FISH was performed as described by Daims et al. (2005).  
220 Details about the optimal formamide concentration used for each probe are given in **Table S4**. The  
221 EUBmix probe set (Amann *et al.*, 1990; Daims *et al.*, 1999) was used to cover all bacteria, and the  
222 nonsense NON-EUB probe (Wallner *et al.*, 1993) was applied as negative control for sequence-  
223 independent probe binding. Microscopic analysis was performed with either an Axioskop  
224 epifluorescence microscope (Carl Zeiss, Germany), equipped with a Leica DFC7000 T CCD  
225 camera, or a white light laser confocal microscope (Leica TCS SP8 X) (Leica Microsystems,  
226 Wetzlar, Germany).

## 228 **Phylogenetic analysis and FISH probe design**

229 Phylogenetic analysis of 16S rRNA gene sequences and the design of FISH probes for individual  
230 species in the genus *Tetrasphaera* were performed using the ARB software v.6.0.6 (Ludwig *et al.*,  
231 2004). A phylogenetic tree was calculated, based on the aligned 72 new full-length ESVs from the  
232 genus *Tetrasphaera*, using the PhyML maximum likelihood method and a 1000-replicate bootstrap  
233 analysis. Unlabelled helper probes and competitor probes were designed for regions predicted to  
234 have low *in situ* accessibility and for single base mismatched non-target sequences, respectively.

235 Potential probes were validated *in silico* with the MathFISH software for hybridization efficiencies  
 236 of target and potentially weak non-target matches (Yilmaz *et al.*, 2011). All probes were purchased  
 237 from Sigma-Aldrich (Denmark) or Biomers (Germany), labelled with 6-carboxyfluorescein (6-  
 238 Fam), indocarbocyanine (Cy3) or indodicarbocyanine (Cy5) fluorochromes. Optimal hybridization  
 239 conditions for novel FISH probes were determined, based on formamide dissociation curves,  
 240 generated after hybridization at different formamide concentrations over a range of 0–70% (v/v)  
 241 with 5% increments. Relative fluorescence intensities of 50 cells were measured with the ImageJ  
 242 software (National Institutes of Health, Maryland, USA) and calculated average values were  
 243 compared for selection of the optimal formamide concentration. Where available, pure cultures  
 244 were obtained from DSMZ and applied in the optimization process. *Tetrasphaera japonica*  
 245 (DSM13192) was used to optimize the probe Tetra183, while *Sanguibacter suarezii* (DSM10543),  
 246 *Lactobacillus reuteri* (DSM20016), and *Janibacter melonis* (DSM16063) were used to assess the  
 247 need for the specific unlabelled competitor probes Tetra67\_C1, Actino221\_C3, and Tetra732\_C1,  
 248 respectively. If appropriate pure cultures were not available, probes were optimized using activated  
 249 sludge biomass with a high abundance of the target organism predicted by amplicon sequencing.

## 250 **Raman microspectroscopy**

251 Raman microspectroscopy was applied in combination with FISH, as previously described  
 252 (Fernando *et al.*, 2019). The approach was used to identify phenotypic differences between probe-  
 253 defined *Tetrasphaera* phylotypes. Briefly, FISH was conducted on optically polished CaF<sub>2</sub> Raman  
 254 windows (Crystran, UK), which give a single-sharp Raman marker at 321 cm<sup>-1</sup> that serves as an  
 255 internal reference point in every spectrum. *Tetrasphaera* species-specific (Cy3) probes (**Table S4**)  
 256 were used to locate the target cells for Raman analysis. After bleaching the Cy3 fluorophore with  
 257 the Raman laser, spectra from single cells were obtained using a Horiba LabRam HR 800 Evolution  
 258 (Jobin Yvon – France) equipped with a Torus MPC 3000 (UK) 532 nm 341 mW solid-state  
 259 semiconductor laser. The Raman spectrometer was calibrated prior to obtaining all measurements to  
 260 the first-order Raman signal of Silicon, occurring at 520.7 cm<sup>-1</sup>. The incident laser power density on  
 261 the sample was attenuated down to 2.1 mW/μm<sup>2</sup> using a set of neutral density (ND) filters. The  
 262 Raman system is equipped with an in-built Olympus (model BX-41) fluorescence microscope. A  
 263 50X, 0.75 numerical aperture dry objective (Olympus M Plan Achromat- Japan), with a working  
 264 distance of 0.38 mm, was used throughout the work. A diffraction grating of 600 mm/groove was  
 265 used, and the Raman spectra collected spanned the wavenumber region of 200 cm<sup>-1</sup> to 1800 cm<sup>-1</sup>.  
 266 The slit width of the Raman spectrometer and the confocal pinhole diameter were set to 100 μm and  
 267 72 μm, respectively. Raman spectrometer operation and subsequent processing of spectra were  
 268 conducted using LabSpec version 6.4 software (Horiba Scientific, France). All spectra were  
 269 baseline corrected using a 6<sup>th</sup> order polynomial fit.

## 270 **Results and discussion:**

### 271 **A comprehensive ecosystem-specific 16S rRNA gene reference database**

272 In order to make a comprehensive ecosystem-specific reference database for Danish wastewater  
273 treatment plants (WWTPs) and their anaerobic digesters, we sampled biomass from 22 typical  
274 WWTPs and 16 anaerobic digesters (ADs) treating waste activated sludge located at Danish  
275 wastewater treatment facilities (**Table S2**). These facilities represent an important engineered  
276 ecosystem containing complex microbial communities of both bacteria and archaea, with the vast  
277 majority of microbes being uncultured and poorly characterized (Wu *et al.*, 2019).

278 DNA and RNA were extracted and pooled separately for each environment and used to  
279 create ecosystem-specific primer-based (DNA-based) and “primer-free” (RNA-based) fSSU  
280 libraries (**Figure 1a**). This resulted in a total of 926,507 fSSU sequences after quality filtering. The  
281 raw sequences were dereplicated and denoised with Unoise3 to generate a comprehensive reference  
282 database of 9,521 ESVs. As each fSSU is independently amplified due to the unique molecular  
283 identifiers (UMIs) added before the PCR amplification steps, the risk of having multiple ESVs with  
284 identical errors is extremely low if we assume random distribution of errors (see supplementary  
285 results). The ESVs are therefore considered to be essentially error-free.

286 To determine the influence of library preparation method, we compared ESVs created based  
287 on fSSU obtained from the four individual libraries. The DNA-based approach yielded approx. 12  
288 times more unique ESVs than the RNA-based approach for the same sequencing cost (**Table S3**).  
289 The reduced number of unique ESVs from the RNA-based libraries was expected, as only 13.3% of  
290 the assembled sequences represented full-length 16S rRNA gene sequences (**Table S3**). As the  
291 Archaea are not targeted by the primers used, we compared the bacterial ESVs from the four  
292 libraries to assess the influence of primer bias (**Figure 1b**). This revealed that 28% and 31% of the  
293 unique ESVs identified in the shallow RNA-based libraries were not present in corresponding

DNA-based libraries for activated sludge and anaerobic digesters, respectively. This reveals a bias associated with the DNA-based method, which is in accordance with previous *in silico* evaluation of primer bias for the 27F and 1492R primer pair (Karst *et al.*, 2018). The same study predicted that a better coverage could be achieved by using the 27F and 1391R primer pair (Klindworth *et al.*, 2013) on the expense of sequence length (Karst *et al.*, 2018).

To estimate the number of full-length ESVs belonging to novel taxa, ESVs were mapped to the SILVA\_132\_SSURef\_Nr99 database (Quast *et al.*, 2013) using usearch, and the identity of the closest relative was compared to the thresholds for taxonomic ranks proposed by Yarza *et al.* 2014) (**Table 1**). The majority of the ESVs (~94%) had references in the SILVA database with genus-level support (identity >94.5%), but 26% lacked references above the species-level (identity > 98.7%) (**Table 1**), which are crucial to confident taxonomic classification (Edgar, 2018).

# ***Evaluation of the full-length ESV database using amplicon data***

In order to evaluate if the full-length ESV database contained high-identity references for all prokaryotes in the ecosystem, we mapped V1-3 amplicon sequencing data obtained from two sources: the same samples used to create the ESV database and samples from unrelated Danish WWTP and ADs. To ensure highest resolution, amplicon data was processed into ASVs. The ecosystem-specific ESV database (9,521 seq.) included more high-identity references (>98.7% identity) for all analyzed samples, compared to the 58-353-fold larger universal databases, such as MiDAS 2.1 (548,447 seq.)(McIlroy *et al.*, 2017), SILVA v.132 SSURef Nr99 (695,171 seq.), SILVA v.132 SSURef (2,090,668 seq.), GreenGenes 16S v.13.5 (1,262,986 seq.), and the full RDP v.11.5 (3,356,808 seq.) (**Figure 1c and Figure S1-S2**). A decrease in percentage of ASVs with high-identity references was observed when low abundant ASVs (the rare biosphere) were included in the analysis. However, the full-length ESV database still performed as well as the larger

universal databases. ASVs were also mapped to the 16S rRNA database derived from the Genome Taxonomy Database (GTDB) release 89 (17,460 seq) (Parks *et al.*, 2018). However, this database lacked high-identity references for almost all ASVs, which probably relates to the fact that 16S rRNA genes often fail to assemble in MAGs produced by short read sequencing data.

Since only Danish WWTPs and ADs were used to establish the comprehensive high-identity full-length ESV reference database, published amplicon data from non-Danish WWTPs (Isazadeh *et al.*, 2016; Gonzalez-Martinez *et al.*, 2016) was also evaluated (**Figure 1d-e, and S3-S4**). Compared to all universal reference databases, the Danish reference ESVs performed better or as well for most of the investigated non-Danish WWTPs, which indicates that the database covers many of the microbes that are common in WWTP across the world. We anticipate that high-throughput 16S rRNA gene sequencing of non-Danish WWTP and ADs will provide references for the region-specific taxa in the future.

### ***A new comprehensive taxonomic framework***

A major limitation in the classification of amplicon data from environmental samples is the lack of lower rank taxonomic information (family, genus, and species names) for many uncultivated bacteria in the universal reference databases. To address this, we developed a robust taxonomic framework (AutoTax), which provides consistent taxonomic classification of all sequences to all seven taxonomic ranks by using a reproducible computational approach, based on identity thresholds (**Figure 2**).

The full-length ESVs were first mapped to the SILVA\_SSURef\_Nr99 database, which provides the taxonomy of the closest relative in the database as well as the percent identity between the ESV and this reference. The taxonomy was assigned to the ESV down to the taxonomic rank that is supported by the sequence identity thresholds proposed by Yarza *et al.* (2014) (**Table 1**). As



the SILVA taxonomy does not include species names, ESVs were also mapped to 16S rRNA gene sequences from type strains extracted from the SILVA database. Species names were added to the ESVs if the identity was above 98.7%, and the genus name obtained from the type strains was identical to that obtained from the complete SILVA database. Although there are examples of separate species with 16S rRNA genes that share more than 98.7% sequence similarity and genomes with intragenomic copies that are less than 98.7% conserved, these are exceptions rather than the norm (Kim *et al.*, 2014; Větrovský and Baldrian, 2013). The AutoTax approach will therefore provide confident species-level classifications for the vast majority of the ESVs.

To fill gaps in the taxonomy, all ESVs were trimmed and clustered using the UCLUST cluster\_smallmem algorithm and the taxonomic thresholds proposed by Yarza *et al.* (2014). With this algorithm sequences are processed in the order they appear in the input file, i.e., if the next sequence matches an existing centroid, it is assigned to that cluster, otherwise it becomes the centroid of a new cluster. This ensures that the same clusters and centroids are formed every time, even if additional ESVs are added to the reference database in the future. The reproducibility of the approach was confirmed by processing only the first half of the ESVs, which yielded identical clusters. Merging of the SILVA- and the *de novo*-based taxonomies may result in conflicts (e.g., multiple ESVs from the same species associate with different genera). When this is the case, the taxonomy for the ESV, which first appears in the reference database, is adapted for all ESVs within that species. The pipeline produces formatted reference databases, which can be directly used for classification using syntax or classifiers in the qiime2 framework.

AutoTax provided placeholder names for many previously undescribed taxa (**Table 2**, **Figure S5**). Essentially all species, more than 72% of all genera, 50% of all families, and 30% of all orders, obtained their names from the *de novo* taxonomy and would otherwise have remained unclassified. The novel taxa were affiliated with several phyla, especially the Proteobacteria,

366 Planctomycetes, Patescibacteria, Firmicutes, Chloroflexi, Bacteroidetes, Actinobacteria, and  
367 Acidobacteria (**Figure S5**). A prominent example is the Chloroflexi, where only 9/14 orders, 8/34  
368 families, and 10/152 genera observed here were classified using the SILVA database, clearly  
369 showing the need for an improved taxonomy. This will have important implications for the study of  
370 these communities, given the high diversity and abundance of members of this phylum and their  
371 association with the sometimes serious operational problems of bulking and foaming (McIlroy *et*  
372 *al.*, 2016; Petriglieri *et al.*, 2018).

373 To benchmark the full-length ESV database, we classified amplicon data obtained from activated  
374 sludge and anaerobic digester samples using this database and compared the results to  
375 classifications obtained from the universal reference databases (**Figure 3a**). The ESV database was  
376 able to classify many more of the ASVs to the genus level (~90%), compared to  
377 SILVA\_132\_SSURef\_Nr99 (~45%), GreenGenes\_16s\_13.5 (~25-30%), GTDB\_r89 (~20-25%),  
378 and the RDP\_16S\_v16 training set (~25%) but also compared to gold standard within wastewater  
379 treatment systems MiDAS 2.1 (~65%), which is a manually ecosystem-specific curated version of  
380 the SILVA\_123\_SSURef\_Nr99 database. Importantly, many of the top 50 most abundant ASVs  
381 only received classification with the AutoTax processed ESV database (**Figure 4 and S6**).

382 The use of the ecosystem-specific full-length ESV database thus significantly improved the  
383 classification at all taxonomic levels and, importantly, provided species-level classifications for the  
384 majority of the ASVs (~85%). To investigate the effect of the taxonomy assignment by AutoTax  
385 alone, we processed the SILVA\_132\_SSURef\_Nr99 database using AutoTax. This increased the  
386 percentage of ASVs classified at the genus-level from ~45% to ~75%, and at the species-level from  
387 0% to ~45%, demonstrating that the large universal databases would also benefit from the use of  
388 AutoTax. However, as better classifications are obtained using smaller ecosystem-specific

databases, we anticipate that such databases should be used whenever a defined ecosystem is studied.

Confident classification of amplicon sequences based on reference databases can be challenging due to the limited taxonomic information in short sequences (Yarza *et al.*, 2014; Edgar, 2018). To investigate the confidence of the amplicon classification, we extracted ASV sets *in silico* from the bacterial full-length ESVs, corresponding to commonly amplified 16S rRNA regions. These ASVs were classified using syntax and the full-length ESV database. We then calculated the fraction of amplicons, which was correctly classified to the same genus and species as their source ESV (**Figure 3b**). More than 95% of the ASVs were assigned to the correct genus and 72-90% to the correct species, depending on primer set used. The primers targeting the V1-3 variable region performed especially well for species-level identification (90% correct classifications), while the commonly used primers targeting the V4 variable region were among the worst (72% correct classifications). Further analysis of the ASV that did not receive a correct classification revealed that the majority did not get any classification, and very few obtained wrong classifications (<0.2% at genus-level and <0.8% at species-level).

Sequencing costs can be reduced considerably if single reads are used instead of merged reads. To evaluate the effect of reduced amplicon length, trimmed forward reads (250 and 200 bp) were also classified (**Figure 3b**). The percentage of correct classifications decreased only marginally for the V1-3, V4, and V45 primer sets, whereas a more pronounced effect was observed for the V3-4, V3-5, and V5-8 ASVs. Single reads of 250 or 200 bp are thus sufficient for some primer sets.

Overall, the analysis demonstrated that the use of a comprehensive, high-quality reference database allows the confident classification of ASV sequences at the genus to species level depending of the primer sets used.

When choosing primers for amplicon sequence analyses, it is important also to take primer-bias into account (Albertsen *et al.*, 2015). If a poor choice is made, process-relevant species may not appear, or they may be severely underestimated. For activated sludge, it has previously been shown that the V1-3 primers have a good overall agreement with metagenomic data and capture many of the process-relevant organisms, whereas the V4 primers underestimate the abundance of the process-critical Chloroflexi and Actinobacteria (Albertsen *et al.*, 2015). Access to a comprehensive ecosystem-specific full-length 16S rRNA gene database provides an opportunity to determine the theoretical coverage of different primer sets *in silico* for the given ecosystem so that an informed decision can be made (Walters *et al.*, 2011; Klindworth *et al.*, 2013).

# ***Species-specific FISH probes for Tetrasphaera spp.***

A valuable benefit for the generation of ecosystem-specific databases is the design and selection of probes and primers for specific populations. FISH-based visualization of populations is central to many studies in microbial ecology, yet with the expanding 16S rRNA gene databases, finding probe sites allowing confident differentiation of target lineages is becoming increasingly difficult. Probe specificity and coverage are routinely assessed, based on all the sequences in public databases, yet both parameters may be very different when considering only the microorganisms present in the ecosystem of study. The use of ecosystem-specific databases therefore provides a more accurate assessment of probe specificity and coverage and will likely also allow the confident design and application of probes for targeting lineages at a higher taxonomic resolution, such as species. To illustrate the benefit of using the new high-quality reference ESV database, more detailed analyses of the genus *Tetrasphaera* were performed. It is the most abundant genus in Danish WWTPs (McIlroy *et al.*, 2017) and is associated with the polyphosphate-accumulating organism (PAO) phenotype, important for the capture and removal of phosphorus in the WWTPs (Nguyen *et*

*al.*, 2011; Marques *et al.*, 2017; Fernando *et al.*, 2019). Despite the importance of the genus, it is unknown how many species co-exist in these systems and whether they all possess the PAO metabolism. Phylogenetic analysis of 75 ESVs belonging to the genus *Tetrasphaera* retrieved in this study revealed an evident separation into 19 species across 22 Danish WWTPs, providing for the first time a comprehensive overview of the diversity of *Tetrasphaera* in activated sludge systems (**Figure 5a**). Several of the sequences retrieved were identical to those of the described pure cultures, while the majority were novel and not present in existing databases. The 10 most abundant species are shown in **Figure 5b**. In order to reveal possible variations in morphology and physiology of *Tetrasphaera*, the new ESV database was used to design a comprehensive set of FISH probes covering the abundant species (**Figure 5a**). Of those, only the two most abundant species in Danish WWTPs were targeted by the existing probes (Actino-658 and Actino-221) (Kong *et al.*, 2005) with high specificity and coverage. Other existing FISH probes targeting genus *Tetrasphaera* (Nguyen *et al.*, 2011) did not show *in silico* high specificity and/or coverage.

The new species-specific probes designed to target the remaining abundant species, which can create up to 2-3% of the biomass in some plants (**Figure 5a**), revealed different morphologies (rod-shaped cells, tetrads, filaments, **Figure 5c**). Having probes for these different species most importantly allows *in situ* single cell analyses for each. Using these FISH probes in combination with Raman microspectroscopy, it was confirmed that all the FISH-defined *Tetrasphaera* species were likely PAOs, based on the presence of a large peak for poly-P ( $1170\text{ cm}^{-1}$ , **Figure 5d**). No Raman peaks were found for other intracellular storage compounds such as glycogen, PHA, or trehalose – consistent with current models for the physiology of the genus in these systems. Additionally, the new reference database was used to design a probe set (Tetra183 + Tetra617) for genus-level screenings of all abundant species of *Tetrasphaera* in Danish plants for (**Figure 5a**), which was otherwise not possible..

461    **Acknowledgements**

462    We would like to thank the 25 wastewater treatment plants involved in the project for providing  
463    samples. This work was supported by the Danish Research Council [6111-00617A to P.H.N.]; and  
464    the Villum foundation [13351 to P.H.N.].

465

466    **Conflict of Interest**

467    The authors declare no conflict of interest.

## 468 **References:**

- 469 Albertsen M, Karst SM, Ziegler AS, Kirkegaard RH, Nielsen PH. (2015). Back to basics - the  
470 influence of DNA extraction and primer choice on phylogenetic analysis of activated sludge  
471 communities. *PLoS One* **10**: e0132783.
- 472 Amann RI, Binder BJ, Olson RJ, Chisolm SW, Devereux R, Stahl DA. (1990). Combination of 16S  
473 rRNA-targeted oligonucleotide probes with flow cytometry for analyzing mixed microbial  
474 populations. *Appl Env Microbiol* **56**: 1919–1925.
- 475 Andersen KSS, Kirkegaard RH, Karst SM, Albertsen M. (2018). ampvis2: an R package to analyse  
476 and visualise 16S rRNA amplicon data. *bioRxiv* 299537.
- 477 Apprill A, McNally S, Parsons R, Weber L. (2015). Minor revision to V4 region SSU rRNA 806R  
478 gene primer greatly increases detection of SAR11 bacterioplankton. *Aquat Microb Ecol* **75**: 129–  
479 137.
- 480 Burke CM, Darling AE. (2016). A method for high precision sequencing of near full-length 16S  
481 rRNA genes on an Illumina MiSeq. *PeerJ* **4**: e2492.
- 482 Callahan BJ, McMurdie PJ, Holmes SP. (2017). Exact sequence variants should replace operational  
483 taxonomic units in marker-gene data analysis. *ISME J* **11**: 2639–2643.
- 484 Callahan BJ, McMurdie PJ, Rosen MJ, Han AW, Johnson AJA, Holmes SP. (2016). DADA2:  
485 High-resolution sample inference from Illumina amplicon data. *Nat Methods* **13**: 581–583.
- 486 Callahan BJ, Wong J, Heiner C, Oh S, Theriot CM, Gulati AS, *et al.* (2019). High-throughput  
487 amplicon sequencing of the full-length 16S rRNA gene with single-nucleotide resolution. *Nucleic*  
488 *Acids Res* 1–12.

489 Caporaso JG, Lauber CL, Walters WA, Berg-Lyons D, Lozupone CA, Turnbaugh PJ, *et al.* (2010).  
490 Global patterns of 16S rRNA diversity at a depth of millions of sequences per sample. *Proc Natl*  
491 *Acad Sci* **108**: 4516 LP – 4522.

492 Chen T, Yu W-H, Izard J, Baranova O V, Lakshmanan A, Dewhirst FE. (2010). The Human Oral  
493 Microbiome Database: a web accessible resource for investigating oral microbe taxonomic and  
494 genomic information. *Database (Oxford)* **2010**: baq013.

495 Cole JR, Wang Q, Fish JA, Chai B, McGarrell DM, Sun Y, *et al.* (2014). Ribosomal Database  
496 Project: data and tools for high throughput rRNA analysis. *Nucleic Acids Res* **42**: D633-42.

497 Daims H, Brühl A, Amann R, Schleifer KH, Wagner M. (1999). The domain-specific probe  
498 EUB338 is insufficient for the detection of all Bacteria: development and evaluation of a more  
499 comprehensive probe set. *Syst Appl Microbiol* **22**: 434–444.

500 Daims H, Stoecker K, Wagner M. (2005). Fluorescence *in situ* hybridization for the detection of  
501 prokaryotes. In: Osborn AM, Smith CJ (eds). *Molecular microbial ecology*. New York: Taylor &  
502 Francis Group, pp 213–239.

503 Desantis TZ, Hugenholtz P, Larsen N, Rojas M, Brodie EL, Keller K, *et al.* (2006). Greengenes , a  
504 Chimera-Checked 16S rRNA Gene Database and Workbench Compatible with ARB. **72**: 5069–  
505 5072.

506 Edgar R. (2016a). SINTAX: a simple non-Bayesian taxonomy classifier for 16S and ITS sequences.  
507 *bioRxiv* 074161.

508 Edgar RC. (2018). Accuracy of taxonomy prediction for 16S rRNA and fungal ITS sequences.  
509 *PeerJ* **6**: e4652.



510 Edgar RC. (2016b). UNOISE2: improved error-correction for Illumina 16S and ITS amplicon  
511 sequencing. *bioRxiv* 81257.

512 Fernando EY, McIlroy SJ, Nierychlo M, Herbst F-A, Schmid MC, Wagner M, *et al.* (2019).  
513 Resolving the individual contribution of key microbial populations to enhanced biological  
514 phosphorus removal with Raman-FISH. *ISME J.* e-pub ahead of print, doi: 10.1101/387795.

515 Glöckner FO, Yilmaz P, Quast C, Gerken J, Beccati A, Ciuprina A, *et al.* (2017). 25 years of  
516 serving the community with ribosomal RNA gene reference databases and tools. *J Biotechnol* **261**:  
517 169–176.

518 Gonzalez-Martinez A, Rodriguez-Sanchez A, Lotti T, Garcia-Ruiz MJ, Osorio F, Gonzalez-Lopez  
519 J, *et al.* (2016). Comparison of bacterial communities of conventional and A-stage activated sludge  
520 systems. *Sci Rep* **6**. e-pub ahead of print, doi: 10.1038/srep18786.

521 Griffen AL, Beall CJ, Firestone ND, Gross EL, DiFranco JM, Hardman JH, *et al.* (2011). CORE: A  
522 phylogenetically-curated 16S rDNA database of the core oral microbiome. *PLoS One* **6**: 1–10.

523 Isazadeh S, Jauffur S, Frigon D. (2016). Bacterial community assembly in activated sludge:  
524 mapping beta diversity across environmental variables. *Microbiologyopen* **5**: 1050–1060.

525 Karst SM, Dueholm MS, McIlroy SJ, Kirkegaard RH, Nielsen PH, Albertsen M. (2018). Retrieval  
526 of a million high-quality , full-length microbial 16S and 18S rRNA gene sequences without primer  
527 bias. *Nat Biotechnol* **36**: 190–195.

528 Karst SM, Ziels RM, Kirkegaard RH, Albertsen M. (2019). Enabling high-accuracy long-read  
529 amplicon sequences using unique molecular identifiers and Nanopore sequencing. *bioRxiv* 645903.

530 Kim M, Oh H-SS, Park S-CC, Chun J. (2014). Towards a taxonomic coherence between average

531 nucleotide identity and 16S rRNA gene sequence similarity for species demarcation of prokaryotes.  
532 *Int J Syst Evol Microbiol* **64**: 346–351.

533 Kirkegaard RH, McIlroy SJ, Kristensen JM, Nierychlo M, Karst SM, Dueholm MS, *et al.* (2017).  
534 The impact of immigration on microbial community composition in full-scale anaerobic digesters.  
535 *Sci Rep* **7**. e-pub ahead of print, doi: 10.1038/s41598-017-09303-0.

536 Klindworth A, Pruesse E, Schweer T, Peplies J, Quast C, Horn M, *et al.* (2013). Evaluation of  
537 general 16S ribosomal RNA gene PCR primers for classical and next-generation sequencing-based  
538 diversity studies. *Nucleic Acids Res* **41**: 1–11.

539 Kong Y, Nielsen JL, Nielsen PH. (2005). Identity and Ecophysiology of Uncultured Actinobacterial  
540 Polyphosphate-Accumulating Organisms in Full-Scale Enhanced Biological Phosphorus Removal  
541 Plants. *Appl Environ Microbiol* **71**: 4076 LP – 4085.

542 Lane DJ. (1991). 16S/23S rRNA sequencing. In: Stackebrandt E, Goodfellow M (eds). *Nucleic Acid*  
543 *Techniques in Bacterial Systematics*. John Wiley and Sons: Chichester, United Kingdom, pp 115–  
544 175.

545 Ludwig W, Strunk O, Westram R, Richter L, Meier H, Yadhukumar a., *et al.* (2004). ARB: A  
546 software environment for sequence data. *Nucleic Acids Res* **32**: 1363–1371.

547 Marques R, Santos J, Nguyen H, Carvalho G, Noronha JP, Nielsen PH, *et al.* (2017). Metabolism  
548 and ecological niche of Tetrasphaera and Ca. Accumulibacter in enhanced biological phosphorus  
549 removal. *Water Res* **122**: 159–171.

550 Martiny JBH, Jones SE, Lennon JT, Martiny AC. (2015). Microbiomes in light of traits: A  
551 phylogenetic perspective. *Science (80- )* **350**: aac9823-18.

552 McDonald D, Hyde E, Debelius JW, Morton JT, Gonzalez A, Ackermann G, *et al.* (2018).  
553 American Gut : an Open Platform for Citizen Science. *mSystems* **3**: 1–28.

554 McIlroy SJ, Kirkegaard RH, McIlroy B, Nierychlo M, Kristensen JM, Karst SMSMSM, *et al.*  
555 (2017). MiDAS 2.0: An ecosystem-specific taxonomy and online database for the organisms of  
556 wastewater treatment systems expanded for anaerobic digester groups. *Database* **2017**: 1–9.

557 McIlroy SJSJ, Karst SMSMSM, Nierychlo M, Dueholm MSMS, Albertsen M, Kirkegaard RHRH,  
558 *et al.* (2016). Genomic and in situ investigations of the novel uncultured Chloroflexi associated with  
559 0092 morphotype filamentous bulking in activated sludge. *ISME J (In press)*: 1–12.

560 Mikaelyan A, Köhler T, Lampert N, Rohland J, Boga H, Meuser K, *et al.* (2015). Classifying the  
561 bacterial gut microbiota of termites and cockroaches: A curated phylogenetic reference database  
562 (DictDb). *Syst Appl Microbiol* **38**: 472–482.

563 Muyzer G, de Waal EC, Uitterlinden AG. (1993). Profiling of complex microbial populations by  
564 denaturing gradient gel electrophoresis analysis of polymerase chain reaction-amplified genes  
565 coding for 16S rRNA. *AEM* **59**: 695–700.

566 Newton IL, Roeselers G. (2012). The effect of training set on the classification of honey bee gut  
567 microbiota using the Naïve Bayesian Classifier. *BMC Microbiol* **12**: 221.

568 Newton RJ, Jones SE, Eiler A, McMahon KD, Bertilsson S. (2011). A Guide to the Natural History  
569 of Freshwater Lake Bacteria.

570 Nguyen HTT, Le VQ, Hansen AA, Nielsen JL, Nielsen PH. (2011). High diversity and abundance  
571 of putative polyphosphate-accumulating Tetrasphaera-related bacteria in activated sludge systems.  
572 *FEMS Microbiol Ecol* **76**: 256–267.

573 Parada AE, Needham DM, Fuhrman JA. (2016). Every base matters: Assessing small subunit rRNA  
574 primers for marine microbiomes with mock communities, time series and global field samples.  
575 *Environ Microbiol* **18**: 1403–1414.

576 Parks DH, Chuvochina M, Waite DW, Rinke C, Skarszewski A, Chaumeil P-A, *et al.* (2018). A  
577 standardized bacterial taxonomy based on genome phylogeny substantially revises the tree of life.  
578 *Nat Biotechnol* **36**: 996.

579 Peterson J, Bonazzi V, Starke-Reed P, Read J, Zakhari S, Baker CC, *et al.* (2009). The NIH Human  
580 Microbiome Project. *Genome Res* **19**: 2317–2323.

581 Petriglieri F, Nierychlo M, Nielsen PH, Jon S, Id M. (2018). In situ visualisation of the abundant  
582 Chloroflexi populations in full-scale anaerobic digesters and the fate of immigrating species. 1–14.

583 Quast C, Pruesse E, Yilmaz P, Gerken J, Schweer T, Yarza P, *et al.* (2013). The SILVA ribosomal  
584 RNA gene database project: Improved data processing and web-based tools. *Nucleic Acids Res* **41**:  
585 D590-6.

586 R Core Team. (2016). R: A language and environment for statistical computing. [http://www.r-](http://www.r-project.org/)  
587 [project.org/](http://www.r-project.org/).

588 Ritari J, Salojärvi J, Lahti L, de Vos WM. (2015). Improved taxonomic assignment of human  
589 intestinal 16S rRNA sequences by a dedicated reference database. *BMC Genomics* **16**: 1056.

590 Rohwer RR, Hamilton JJ, Newton RJ, McMahon KD. (2018). TaxAss: Leveraging a Custom  
591 Freshwater Database Achieves Fine-Scale Taxonomic Resolution. *mSphere* **3**: 1–14.

592 RStudio Team. (2015). RStudio: Integrated Development Environment for R.  
593 <http://www.rstudio.com/>.

Seedorf H, Kittelmann S, Henderson G, Janssen PH. (2014). RIM-DB: a taxonomic framework for community structure analysis of methanogenic archaea from the rumen and other intestinal environments. *PeerJ* **2**: e494.

Segota I, Long T. (2019). A high-resolution pipeline for 16S-sequencing identifies bacterial strains in human microbiome.

Single- DRR, Sequence NC. (2017). Deblur Rapidly Resolves Single-. **2**: 1–7.

Thompson LR, Sanders JG, McDonald D, Amir A, Ladau J, Locey KJ, *et al.* (2017). A communal catalogue reveals Earth’s multiscale microbial diversity. *Nature* **551**: 457–463.

Větrovský T, Baldrian P. (2013). The Variability of the 16S rRNA Gene in Bacterial Genomes and Its Consequences for Bacterial Community Analyses. *PLoS One* **8**: 1–10.

Wallner G, Amann R, Beisker W. (1993). Optimizing fluorescent *in situ* hybridization with rRNA-targeted oligonucleotide probes for flow cytometric identification of microorganisms. *Cytometry* **14**: 136–143.

Walters WA, Caporaso JG, Lauber CL, Berg-Lyons D, Fierer N, Knight R. (2011). PrimerProspector: De novo design and taxonomic analysis of barcoded polymerase chain reaction primers. *Bioinformatics* **27**: 1159–1161.

Wang Q, Garrity GM, Tiedje JM, Cole JR. (2007). Naive Bayesian classifier for rapid assignment of rRNA sequences into the new bacterial taxonomy. *Appl Environ Microbiol* **73**: 5261–5267.

Wickham H. (2009). ggplot2 - Elegant Graphics for Data Analysis. Springer Science & Business Media.

614 Wu L, Ning D, Zhang B, Li Y, Zhang P, Shan X, *et al.* (2019). Global diversity and biogeography  
615 of bacterial communities in wastewater treatment plants. *Nat Microbiol.* e-pub ahead of print, doi:  
616 10.1038/s41564-019-0426-5.

617 Yarza P, Yilmaz P, Pruesse E, Glöckner FO, Ludwig W, Schleifer K-H, *et al.* (2014). Uniting the  
618 classification of cultured and uncultured bacteria and archaea using 16S rRNA gene sequences. *Nat*  
619 *Rev Microbiol* **12**: 635–645.

620 Yilmaz LS, Parnerkar S, Noguera DR. (2011). MathFISH, a web tool that uses thermodynamics-  
621 based mathematical models for *in silico* evaluation of oligonucleotide probes for fluorescence *in*  
622 *situ* hybridization. *Appl Environ Microbiol* **77**: 1118–1122.

623

## Tables:

**Table 1: Numbers and percentage of full-length ESVs estimated to belong to novel taxa.** ESVs were mapped to SILVA\_132\_SSURef\_Nr99 to find the identity with the closest relative in the database. Novelty was determined, based on the identity for each ESV, based on the taxonomic thresholds proposed by Yarza et al. (2014).

| Environment        | Library  | Kingdom  | nSeqs | Species<br><98.7% | Genus<br><94.5% | Family<br><86.5% | Order<br><82.0% | Class<br><78.5% | Phylum<br><75.0% |
|--------------------|----------|----------|-------|-------------------|-----------------|------------------|-----------------|-----------------|------------------|
| Activated sludge   | RNA      | Archaea  | 5     | 0                 | 0               | 0                | 0               | 0               | 0                |
| Activated sludge   | RNA      | Bacteria | 460   | 35 (7.61%)        | 1 (0.22%)       | 0                | 0               | 0               | 0                |
| Activated sludge   | DNA      | Bacteria | 6225  | 1530 (24.6%)      | 328 (5.27%)     | 10 (0.16%)       | 2 (0.03%)       | 1 (0.02%)       | 1 (0.02%)        |
| Anaerobic digester | RNA      | Archaea  | 74    | 0                 | 0               | 0                | 0               | 0               | 0                |
| Anaerobic digester | RNA      | Bacteria | 235   | 33 (14.0%)        | 6 (2.55%)       | 0                | 0               | 0               | 0                |
| Anaerobic digester | DNA      | Bacteria | 4173  | 937 (22.5%)       | 222 (5.32%)     | 4 (0.096%)       | 1 (0.02%)       | 0               | 0                |
| Combined           | Combined | Archaea  | 75    | 0                 | 0               | 0                | 0               | 0               | 0                |
| Combined           | Combined | Bacteria | 9446  | 2434 (25.8%)      | 545 (5.77%)     | 15 (0.16%)       | 3 (0.03%)       | 1 (0.01%)       | 1 (0.01%)        |

**Table 2: Numbers and percentage of taxa which were assigned *de novo* names.**

| Environment        | Library  | Kingdom  | Species      | Genus        | Family      | Order      | Class      | Phylum    |
|--------------------|----------|----------|--------------|--------------|-------------|------------|------------|-----------|
| Activated sludge   | RNA      | Archaea  | 1 (50%)      | 0            | 0           | 0          | 0          | 0         |
| Activated sludge   | RNA      | Bacteria | 189 (88.7%)  | 47 (40.9%)   | 16 (22.5%)  | 5 (10.2%)  | 0          | 0         |
| Activated sludge   | DNA      | Bacteria | 2709 (92.6%) | 893 (71.2%)  | 180 (44.4%) | 45 (24.9%) | 9 (12.3%)  | 1 (2.94%) |
| Anaerobic digester | RNA      | Archaea  | 10 (58.8%)   | 0            | 0           | 0          | 0          | 0         |
| Anaerobic digester | RNA      | Bacteria | 117 (91.4%)  | 50 (51.6%)   | 21 (30.4%)  | 6 (12.0%)  | 3 (9.68%)  | 0         |
| Anaerobic digester | DNA      | Bacteria | 1760 (92.5%) | 595 (66.0%)  | 132 (43.9%) | 36 (23.1%) | 8 (11.43%) | 0         |
| Combined           | Combined | Archaea  | 10 (58.8%)   | 0            | 0           | 0          | 0          | 0         |
| Combined           | Combined | Bacteria | 3879 (93.3%) | 1284 (72.4%) | 260 (50%)   | 67 (29.9%) | 13 (14.4%) | 1 (2.44%) |

# Figures:

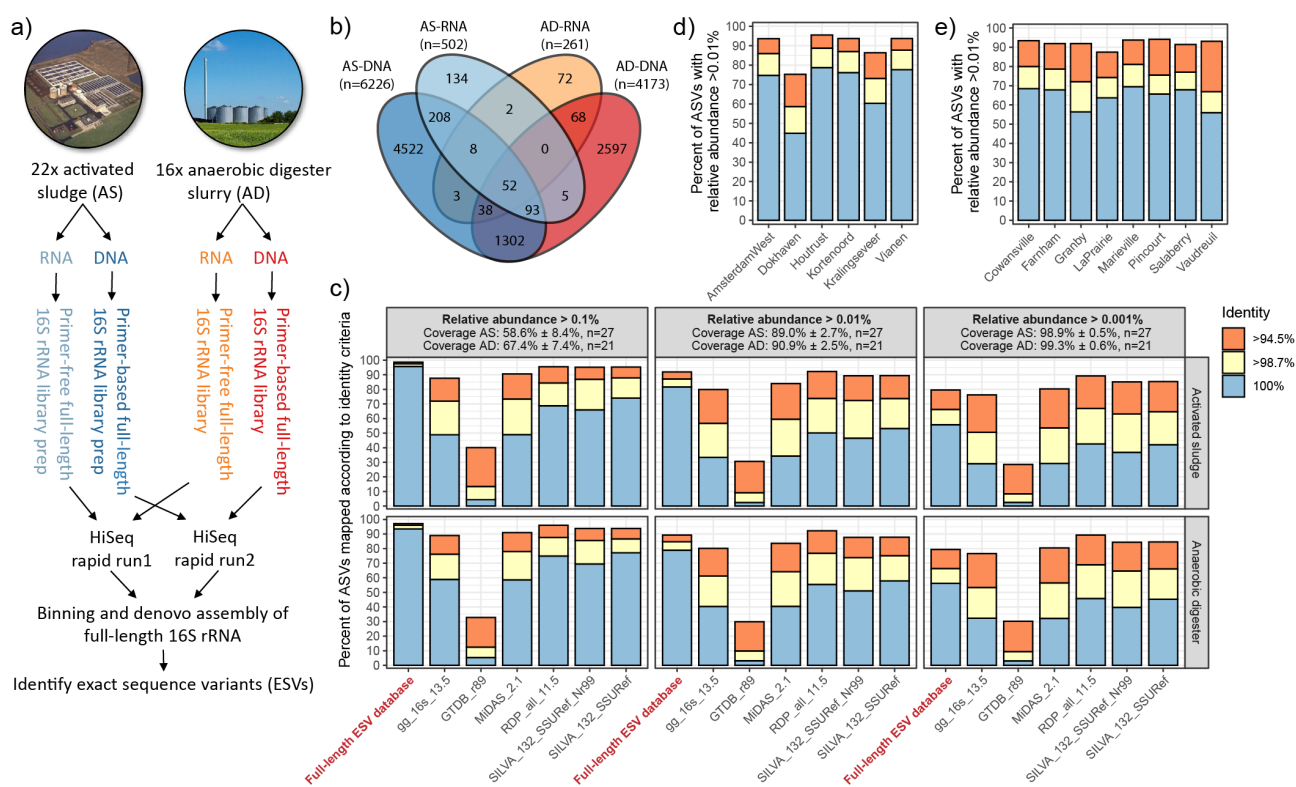

**Figure 1. Construction and evaluation of the full-length ESV reference database. a)**

Preparation of full-length ESVs. Samples were collected from WWTPs and anaerobic digesters, and DNA and RNA were extracted. Purified DNA or RNA were used for preparation of primer-based and “primer-free” full-length 16S rRNA libraries, respectively. These were sequenced and processed bioinformatically to produce a comprehensive ecosystem-specific full-length ESV database. A detailed description is provided in the supplementary results. b) Venn-diagram showing bacterial ESVs shared between individual libraries. c) Mapping of V1-3 amplicon data to the full-length ESV database and common 16S rRNA reference databases. ASVs were obtained from activated sludge and anaerobic digester samples and filtered based on their relative abundance, before the analysis to uncover the depth of the full-length ESV database. The fraction of the microbial community represented by the remaining ASVs after the filtering (coverage) is shown as mean  $\pm$  standard deviation across plants. d) Mapping of ASVs from Dutch WWTPs based on raw data from Gonzalez-Martinez et al. (Gonzalez-Martinez *et al.*, 2016). For details, see Figure S3. e) Mapping of ASVs from Canadian WWTPs, based on raw data from Isazadeh et al. 2016 (Isazadeh *et al.*, 2016). For details, see Figure S4.



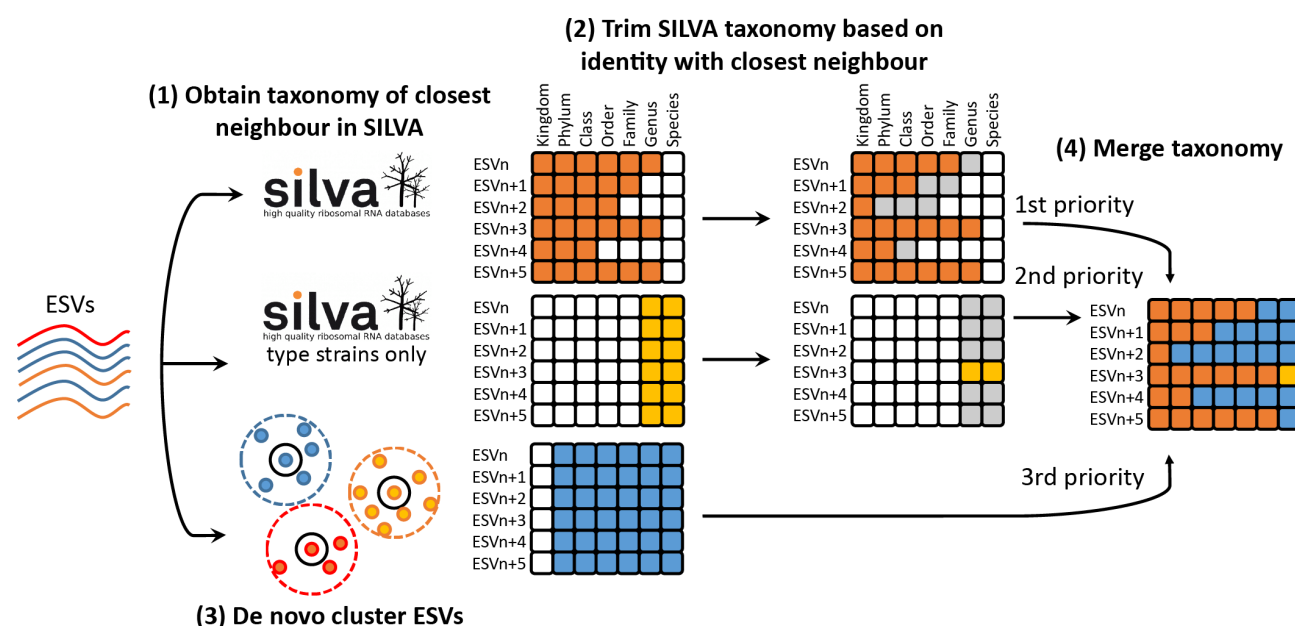

**Figure 2. The AutoTax taxonomic framework.** (1) Full-length ESVs were first mapped to the SILVA\_132\_SSURF\_Nr99 database to identify the closest relative and the shared percent identity. (2) Taxonomy was adopted from this sequence after trimming, based on percent identity and the taxonomic thresholds proposed by Yarza et al. (Yarza *et al.*, 2014). To gain species information, ESVs were also mapped to sequences from type strains extracted from the SILVA database, and species names were adopted if the identity was >98.7% and the type strain genus matched that of the closest relative in the complete database. (3) ESVs were also clustered by greedy clustering at different identities, corresponding to the thresholds proposed by Yarza et al. (Yarza *et al.*, 2014) to generate a stable *de novo* taxonomy. (4) Finally, a comprehensive taxonomy was obtained by filling gaps in the SILVA-based taxonomy with the *de novo*-taxonomy.

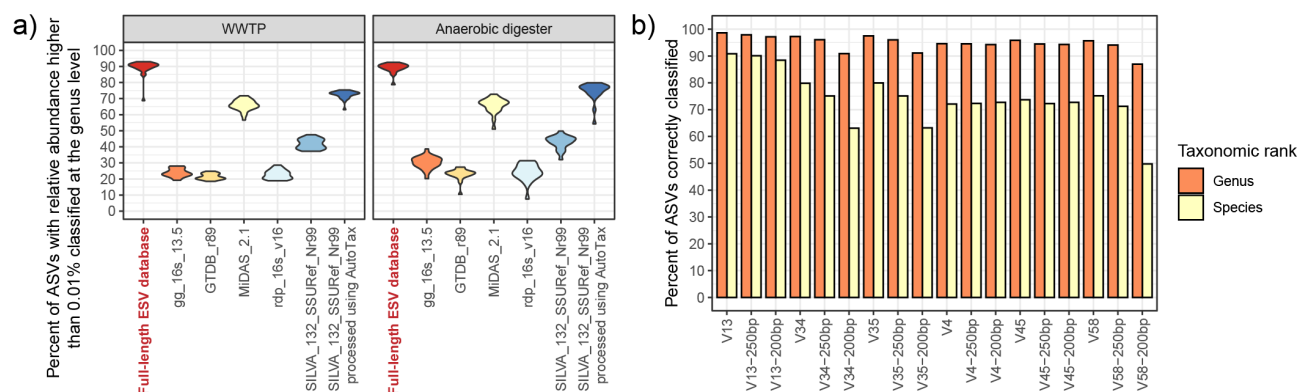

**Figure 3. Classification of amplicons.** a) Percentage of ASVs from each activated sludge and anaerobic digester sample with a relative coverage of more than 0.01% that were classified to the genus level when classified using the full-length ESV reference database, common reference databases for taxonomic classification, and the SILVA databases processed using AutoTax. b) Classification of *in silico* bacterial ASVs, corresponding to amplicons produced using common primer set on the ESVs. Results are shown for the full amplicons as well as for partial amplicons, equivalent to the first 250 or 200 bp. V13 (Lane 1991) (Lane, 1991), V34 (Klindworth et al. 2013) (Klindworth *et al.*, 2013), V35 (Peterson et al. 2009) (Peterson *et al.*, 2009), V4 (Apprill et al. 2015) (Apprill *et al.*, 2015), V45 (Parada et al. 2016) (Parada *et al.*, 2016), and V58 (Klindworth et al. 2013) (Klindworth *et al.*, 2013).

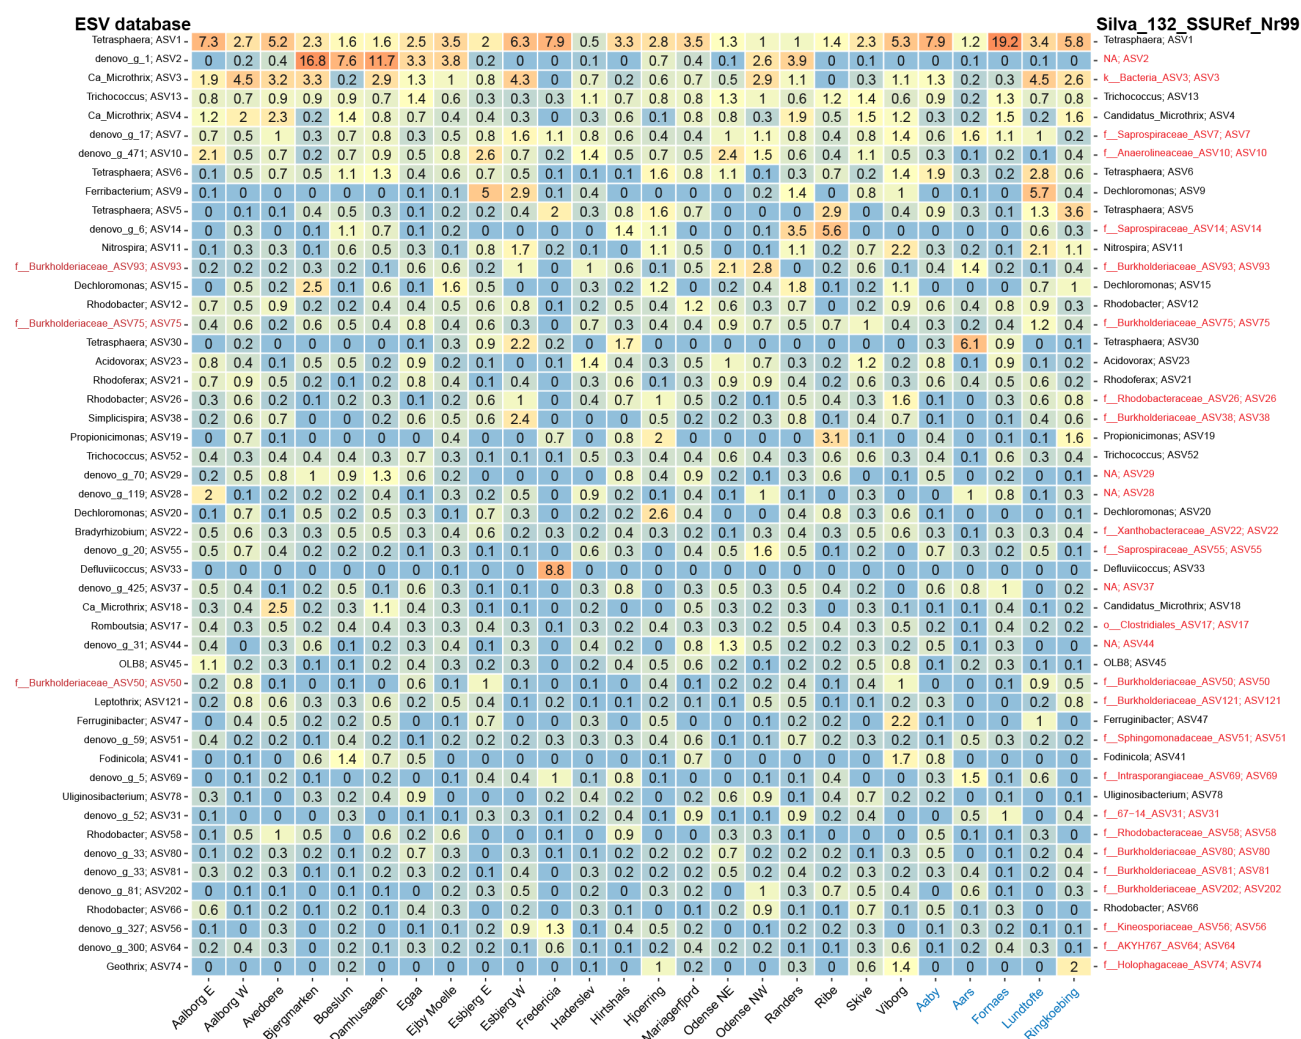

Source: https://www.biorxiv.org/content/biorxiv/early/2019/09/27/672873.full.pdf
